# Supplementary material for: Synthesis, characterization and utility of a series of novel copper(ii) complexes as excellent surface disinfectants against nosocomial infections
Source: Royal Society of Chemistry journal article supplement (doi:10.1039/d1dt00199j), 2021-01-01
Supplement: d1dt00199j1.pdf [file d1dt00199j1.pdf]

**Synthesis, characterization and utility of a series of novel copper(II) complexes as an excellent surface disinfectant against nosocomial infections**

**\*Richa<sup>a</sup>, \*Namrata Kushwaha<sup>b</sup>, Sheetal Negi<sup>b</sup>, Ajay Kumar,<sup>a</sup> Ennio Zangrando<sup>c</sup>, Ramesh Kataria<sup>a#</sup>, Vikram Saini<sup>b</sup> #**

<sup>a</sup> Department of Chemistry & Centre of Advance Studies in Chemistry, Panjab University, Chandigarh, 160014, India.

<sup>b</sup> Laboratory of Infection Biology and Translational Research, Department of Biotechnology, All India Institute of Medical Sciences (AIIMS), New Delhi, 110029, India.

<sup>c</sup> Department of Chemical and Pharmaceutical Sciences, University of Trieste, Trieste 34127, Italy

\*denotes equal contribution

**#Correspondence:**

**Dr. Vikram Saini**

Assistant Professor & HarGobind Khorana Innovative Young Biotechnologist (IYBA) Fellow,

Department of Biotechnology, All India Institute of Medical Sciences (AIIMS), New Delhi, India

Email: vikram@aiims.edu

**Dr. Ramesh Kataria**

Assistant Professor, Department of Chemistry & Centre of Advance Studies in Chemistry, Panjab University, Chandigarh, India.

**Email:** rkataria@pu.ac.in

Supplementary Material

**Table S1.** Crystallographic data and refinement parameters for complexes **5a-5f**.

| <b>Complex</b>                                     | <b>5a</b>                                                        | <b>5b</b>                                                         | <b>5c</b>                                                         | <b>5d</b>                                                        | <b>5e</b>                                                       | <b>5f</b>                                                       |
|----------------------------------------------------|------------------------------------------------------------------|-------------------------------------------------------------------|-------------------------------------------------------------------|------------------------------------------------------------------|-----------------------------------------------------------------|-----------------------------------------------------------------|
| <b>CCDC</b>                                        | 2052523                                                          | 2052524                                                           | 2052525                                                           | 2052526                                                          | 2052527                                                         | 2052528                                                         |
| <b>Empirical formula</b>                           | C <sub>21</sub> H <sub>18</sub> CuFN <sub>3</sub> O <sub>4</sub> | C <sub>21</sub> H <sub>18</sub> CuClN <sub>3</sub> O <sub>4</sub> | C <sub>21</sub> H <sub>18</sub> CuBrN <sub>3</sub> O <sub>4</sub> | C <sub>23</sub> H <sub>21</sub> CuIN <sub>4</sub> O <sub>4</sub> | C <sub>21</sub> H <sub>19</sub> CuN <sub>3</sub> O <sub>4</sub> | C <sub>28</sub> H <sub>25</sub> CuN <sub>3</sub> O <sub>4</sub> |
| <b>M<sub>r</sub> [g mol<sup>-1</sup>]</b>          | 458.92                                                           | 475.37                                                            | 519.83                                                            | 607.88                                                           | 440.93                                                          | 531.05                                                          |
| <b>crystal system</b>                              | triclinic                                                        | triclinic                                                         | triclinic                                                         | triclinic                                                        | triclinic                                                       | monoclinic                                                      |
| <b>space group</b>                                 | <i>P</i> -1                                                      | <i>P</i> -1                                                       | <i>P</i> -1                                                       | <i>P</i> -1                                                      | <i>P</i> -1                                                     | <i>P</i> 2 <sub>1</sub> / <i>n</i>                              |
| <b><i>a</i> [Å]</b>                                | 9.0860(2)                                                        | 9.1761(3)                                                         | 9.0332(3)                                                         | 8.9881(3)                                                        | 9.1448(7)                                                       | 8.5888(3)                                                       |
| <b><i>b</i> [Å]</b>                                | 9.1382(2)                                                        | 9.2338(3)                                                         | 9.2739(3)                                                         | 9.2451(4)                                                        | 9.1465(7)                                                       | 10.4392(4)                                                      |
| <b><i>c</i> [Å]</b>                                | 13.8154(3)                                                       | 14.1378(4)                                                        | 14.3155(4)                                                        | 16.5516(7)                                                       | 13.5672(11)                                                     | 27.4486(8)                                                      |
| <b><i>α</i> [deg]</b>                              | 100.565(2)                                                       | 99.591(2)                                                         | 98.566(2)                                                         | 74.599(4)                                                        | 100.002(7)                                                      | 90.0                                                            |
| <b><i>β</i> [deg]</b>                              | 99.858(2)                                                        | 98.741(2)                                                         | 98.464(2)                                                         | 86.394(3)                                                        | 100.450(7)                                                      | 92.294(3)                                                       |
| <b><i>γ</i> [deg]</b>                              | 114.860(2)                                                       | 115.625(3)                                                        | 115.332(3)                                                        | 64.904(4)                                                        | 115.079(8)                                                      | 90.0                                                            |
| <b><i>V</i> [Å<sup>3</sup>]</b>                    | 982.71(4)                                                        | 1030.62(6)                                                        | 1041.57(6)                                                        | 1198.86(9)                                                       | 969.95(15)                                                      | 2459.07(15)                                                     |
| <b><i>Z</i></b>                                    | 2                                                                | 2                                                                 | 2                                                                 | 2                                                                | 2                                                               | 4                                                               |
| <b><i>ρ</i><sub>calc</sub> [g cm<sup>-3</sup>]</b> | 1.551                                                            | 1.532                                                             | 1.658                                                             | 1.684                                                            | 1.510                                                           | 1.434                                                           |
| <b><i>μ</i> [mm<sup>-1</sup>]</b>                  | 1.155                                                            | 1.222                                                             | 3.000                                                             | 2.235                                                            | 1.159                                                           | 0.928                                                           |
| <b><i>F</i>(000)</b>                               | 470.0                                                            | 486                                                               | 522                                                               | 602                                                              | 454                                                             | 1100                                                            |
| <b>crystal size [mm]<sup>3</sup></b>               | 0.17×0.15×0.13                                                   | 0.25×0.22×0.2                                                     | 0.2×0.18×0.16                                                     | 0.26×0.24×0.2                                                    | 0.22×0.2×0.18                                                   | 0.17×0.16×0.12                                                  |
| <b><i>θ</i><sub>range</sub> [deg]</b>              | 3.36-25.87                                                       | 3.27-25.82                                                        | 3.19-27.40                                                        | 3.34-27.434                                                      | 3.18-25.26                                                      | 3.18-27.32                                                      |
| <b>reflections collected</b>                       | 8810                                                             | 8168                                                              | 14511                                                             | 15511                                                            | 6887                                                            | 21387                                                           |
| <b>Indep reflections</b>                           | 3669                                                             | 3863                                                              | 4391                                                              | 5085                                                             | 3354                                                            | 5188                                                            |
| <b>R<sub>int</sub></b>                             | 0.0328                                                           | 0.0330                                                            | 0.0393                                                            | 0.0634                                                           | 0.0443                                                          | 0.1338                                                          |
| <b>Parameters refined</b>                          | 273                                                              | 273                                                               | 273                                                               | 301                                                              | 264                                                             | 327                                                             |
| <b>GOF on <i>F</i><sup>2</sup></b>                 | 1.043                                                            | 1.034                                                             | 1.044                                                             | 1.069                                                            | 1.020                                                           | 1.053                                                           |
| <b>R1, wR2 [I &gt; 2σ(I)]</b>                      | 0.0323, 0.0787                                                   | 0.0359, 0.0927                                                    | 0.0330, 0.0690                                                    | 0.0671, 0.1750                                                   | 0.0489, 0.1361                                                  | 0.0631, 0.1660                                                  |
| <b>R1, wR2 (all data)</b>                          | 0.0399, 0.0821                                                   | 0.0418, 0.0980                                                    | 0.0467, 0.0726                                                    | 0.1091, 0.1963                                                   | 0.0646, 0.1485                                                  | 0.0903, 0.1921                                                  |
| <b>residuals [e Å<sup>-3</sup>]</b>                | 0.27, -0.25                                                      | 0.315, -0.348                                                     | 0.742, -0.657                                                     | 0.630, -0.867                                                    | 0.362, -0.463                                                   | 0.388, -0.817                                                   |

**Table S2.** Coordination bond lengths (Å) and angles (°) for complexes **5a**, **5b**, and **5c**.

|              | <b>5a</b>  | <b>5b</b>  | <b>5c</b>  |
|--------------|------------|------------|------------|
| Cu-O(1)      | 1.9000(14) | 1.8994(16) | 1.9030(14) |
| Cu-O(2)      | 1.8671(15) | 1.8633(17) | 1.8681(15) |
| Cu-N(2)      | 1.9244(17) | 1.923(2)   | 1.9217(18) |
| Cu-N(3)      | 2.0233(17) | 2.0289(19) | 2.0253(17) |
| O(1)-Cu-N(2) | 83.34(6)   | 83.31(7)   | 83.38(7)   |
| O(1)-Cu-N(3) | 92.10(7)   | 92.20(7)   | 92.24(7)   |
| O(2)-Cu-O(1) | 176.86(6)  | 175.59(8)  | 174.61(7)  |
| O(2)-Cu-N(2) | 93.59(7)   | 93.50(8)   | 93.43(7)   |
| O(2)-Cu-N(3) | 90.92(7)   | 90.79(8)   | 90.90(7)   |
| N(2)-Cu-N(3) | 173.99(7)  | 175.29(8)  | 175.57(7)  |

**Table S3.** Coordination bond lengths (Å) and angles (°) for complexes **5d**, **5e**, and **5f**.

|              | <b>5d</b>  | <b>5e</b>  | <b>5f</b>  |
|--------------|------------|------------|------------|
| Cu-O(1)      | 1.896(4)   | 1.894(3)   | 1.910(2)   |
| Cu-O(2)      | 1.846(4)   | 1.859(3)   | 1.912(2)   |
| Cu-N(2)      | 1.913(4)   | 1.916(3)   | 1.915(3)   |
| Cu-N(3)      | 2.022(4)   | 2.021(3)   | 1.991(3)   |
| Cu-O(2)'     | -          | -          | 2.711(3)   |
| O(1)-Cu-N(2) | 83.26(16)  | 83.23(11)  | 82.72(11)  |
| O(1)-Cu-N(3) | 91.62(16)  | 91.94(12)  | 98.96(11)  |
| O(2)-Cu-O(1) | 176.24(17) | 177.15(9)  | 165.11(11) |
| O(2)-Cu-N(2) | 93.99(16)  | 93.97(11)  | 91.53(10)  |
| O(2)-Cu-N(3) | 91.41(16)  | 90.81(11)  | 89.82(10)  |
| N(2)-Cu-N(3) | 171.66(19) | 173.41(12) | 166.56(11) |

O(2)' at 1-x, 1-y, 1-z.

**Table S4.** Hydrogen bond parameters (Å /°) for complexes **5a-5f**.

| complex   | D-H    | A  | d(D-H) | d(H..A) | d(D..A)  | <DHA | Symmetry code |
|-----------|--------|----|--------|---------|----------|------|---------------|
| <b>5a</b> | N3-H3a | O1 | 0.89   | 2.24    | 3.013(3) | 145  | 1-x,-y,1-z    |
|           | N3-H3b | O4 | 0.89   | 2.14    | 3.019(3) | 168  | -1+x,-1+y,z   |
| <b>5b</b> | N3-H3a | O4 | 0.89   | 2.15    | 3.021(3) | 168  | -1+x,-1+y,z   |
|           | N3-H3b | O1 | 0.89   | 2.24    | 3.016(3) | 146  | -x,1-y,1-z    |
| <b>5c</b> | N3-H3a | O1 | 0.89   | 2.20    | 2.969(3) | 145  | 2-x,1-y,1-z   |
|           | N3-H3b | O4 | 0.89   | 2.14    | 3.014(2) | 169  | 1+x,1+y,z     |
| <b>5d</b> | N3-H3a | O1 | 0.89   | 2.21    | 2.988(6) | 147  | 2-x,1-y,1-z   |
|           | N3-H3b | O4 | 0.89   | 2.18    | 3.054(6) | 168  | 1+x,-1+y,z    |
| <b>5e</b> | N3-H3a | O4 | 0.89   | 2.17    | 3.046(4) | 168  | -1+x,-1+y,z   |
|           | N3-H3b | O1 | 0.89   | 2.25    | 3.015(4) | 143  | -x,1-y,1-z    |
| <b>5f</b> | N3-H3a | O4 | 0.89   | 2.20    | 3.020(4) | 153  | 2-x,1-y,1-z   |

**Table S5.** Analysis of C-H... $\pi$ -ring interactions for complexes **5a-5f**.

| X-H       | Cg  | d(X-H) | d(H..Cg) | d(X..Cg) | <XHCg | Symmetry code        |
|-----------|-----|--------|----------|----------|-------|----------------------|
| <b>5a</b> |     |        |          |          |       |                      |
| C15-H15a  | Cg1 | 0.96   | 2.90     | 3.625(4) | 133   | 1+x, 1+y, z          |
| <b>5b</b> |     |        |          |          |       |                      |
| C15-H15c  | Cg1 | 0.96   | 2.85     | 3.556(4) | 131   | 1+x, 1+y, z          |
| <b>5c</b> |     |        |          |          |       |                      |
| C15-H15a  | Cg1 | 0.96   | 2.79     | 3.509(3) | 132   | -1+x, -1+y, z        |
| <b>5d</b> |     |        |          |          |       |                      |
| C15-H15a  | Cg1 | 0.96   | 2.98     | 3.739(8) | 136   | -1+x, 1+y, z         |
| <b>5e</b> |     |        |          |          |       |                      |
| C15-H15c  | Cg1 | 0.96   | 2.84     | 3.627(6) | 139   | 1+x, 1+y, z          |
| <b>5f</b> |     |        |          |          |       |                      |
| C6-H6     | Cg7 | 0.93   | 2.93     | 3.732(5) | 146   | x, 1+y, z            |
| C14-H14b  | Cg6 | 0.96   | 2.98     | 3.680(4) | 131   | 1-x, 1-y, 1-z        |
| C15-H15a  | Cg2 | 0.96   | 2.63     | 3.517(4) | 154   | 2-x, 1-y, 1-z        |
| C26-H26   | Cg5 | 0.93   | 2.78     | 3.549(6) | 141   | 3/2-x, -1/2+y, 1/2-z |

Cg1 = aniline ring C16/C21. For **5f** Cg2 = Cu/O2/C8/C12/C13/N2; Cg5 = benzohydrazide ring C2/C7; Cg6 = benzhydrylamine phenyl ring C17/C22; Cg7 = benzhydrylamine phenyl ring C23/C28.

**Table S6:** Electrostatic properties of metal complexes (**5a-5f**) calculated using DFT methods.

| S.No | Compound  | HOMO   | LUMO   | Chemical potential | Chemical hardness | Electrophilicity index ( $\omega$ )= $\mu^2/2\eta$ | Chemical softness |
|------|-----------|--------|--------|--------------------|-------------------|----------------------------------------------------|-------------------|
| 1    | <b>5a</b> | -16.06 | -14.79 | -15.43             | 0.64              | 187.13                                             | 1.57              |
| 2    | <b>5b</b> | -15.85 | -14.64 | -15.24             | 0.61              | 191.83                                             | 1.65              |
| 3    | <b>5c</b> | -15.71 | -14.48 | -15.09             | 0.61              | 185.78                                             | 1.63              |
| 4    | <b>5d</b> | -15.45 | -14.28 | -14.86             | 0.585             | 188.73                                             | 1.70              |
| 5    | <b>5e</b> | -16.04 | -14.75 | -15.40             | 0.65              | 183.51                                             | 1.55              |
| 6    | <b>5f</b> | -5.59  | -1.87  | -3.73              | 1.86              | 3.74                                               | 0.54              |

**Table S7:** Results of cyclic voltammogram of complexes **5a-5f**.

| Sr. No. | Name of the Copper compounds | Epc1(V) | Epc2 (V) | Epa1 (V) |
|---------|------------------------------|---------|----------|----------|
| 1       | [CuL(4F-An)] (5a)            | -0.51   | 0.37     | 0.45     |
| 2       | [CuL(4Cl-An)] (5b)           | -0.53   | 0.35     | 0.46     |
| 3       | [CuL(4Br-An)] (5c)           | -0.56   | 0.34     | 0.46     |
| 4       | [CuL(4I-An)] (5d)            | -0.60   | 0.32     | 0.43     |
| 5       | [CuL(An)] (5e)               | -0.51   | 0.36     | 0.46     |
| 6       | [CuL(Benzhydramine)] (5f)    | -0.53   | 0.34     | 0.44     |

**Table S8.** Details of the HRMS study of copper complexes **5a-5f**.

| Complex   | Formula                                                            | Ion Peak m/z [M+H] <sup>+</sup> |          |
|-----------|--------------------------------------------------------------------|---------------------------------|----------|
|           |                                                                    | Calculated                      | Found    |
| <b>5a</b> | C <sub>21</sub> H <sub>18</sub> O <sub>4</sub> N <sub>3</sub> CuF  | 459.0656                        | 459.0438 |
| <b>5b</b> | C <sub>21</sub> H <sub>18</sub> O <sub>4</sub> N <sub>3</sub> CuCl | 475.0360                        | 475.0761 |
| <b>5c</b> | C <sub>21</sub> H <sub>18</sub> O <sub>4</sub> N <sub>3</sub> CuBr | 518.9855                        | 519.1699 |
| <b>5d</b> | C <sub>21</sub> H <sub>18</sub> O <sub>4</sub> N <sub>3</sub> CuI  | 566.9716                        | 567.0185 |
| <b>5e</b> | C <sub>21</sub> H <sub>19</sub> O <sub>4</sub> N <sub>3</sub> Cu   | 441.0750                        | 441.4246 |
| <b>5f</b> | C <sub>28</sub> H <sub>25</sub> O <sub>4</sub> N <sub>3</sub> Cu   | 531.1219                        | 531.0933 |

**Table S9:** Antimicrobial efficacy of individual ligands and the Minimum Inhibitory Concentration (MIC) of the compounds (μg/mL). No killing indicates that no significant difference in bacterial survival till 512 μg/mL.

|    |                                | <i>S. aureus</i> | <i>K. pneumoniae</i> | <i>E. coli</i> |
|----|--------------------------------|------------------|----------------------|----------------|
| 1. | Copper acetate                 | No Killing       | No Killing           | No Killing     |
|    | Complex 4                      | No Killing       | No Killing           | No Killing     |
|    | 4-Chloroaniline                | No Killing       | No Killing           | No Killing     |
|    | <b>5b</b> [CuL(4Cl-An)]        | 20.62 μg/mL      | >64 μg/mL            | 44.45 μg/mL    |
| 2. | Copper acetate                 | No Killing       | No Killing           | No Killing     |
|    | Complex 4                      | No Killing       | No Killing           | No Killing     |
|    | Aniline                        | 10%              | No Killing           | No Killing     |
|    | <b>5e</b> [CuL(An)]            | 11.89 μg/mL      | No Killing           | >64 μg/mL      |
| 3. | Copper acetate                 | No Killing       | No Killing           | No Killing     |
|    | Complex 4                      | No Killing       | No Killing           | No Killing     |
|    | Benzhydramine                  | 20%              | No Killing           | No Killing     |
|    | <b>5f</b> [CuL(Benzhydramine)] | 2.435 μg/mL      | >64 μg/mL            | 25.29 μg/mL    |

**Table S10: Summary of TGA results.**

| Code | Compound             | Temperature Range(°C) | Weight Loss Found/(Calcd.) | Assignment                                            |
|------|----------------------|-----------------------|----------------------------|-------------------------------------------------------|
| 5a   | CuL(4F-An)           | 25-240                | 30.05(29.09)               | Loss of 4-flouroaniline and CO molecule               |
|      |                      | 240-350               | 23.77(24.25)               | Loss of NO and NO <sub>2</sub>                        |
| 5b   | CuL(4Cl-An)          | 25-230                | 36.09(36.54)               | Loss of 4-chloroaniline and CO <sub>2</sub> molecule  |
|      |                      | 230-360               | 25.02(26.75)               | Loss of NO and NO <sub>2</sub>                        |
| 5c   | CuL(4Br-An)          | 25-270                | 33.09(33.83)               | Loss of 4-bromoaniline                                |
|      |                      | 270-360               | 25.31(24.62)               | Loss of CO <sub>2</sub> and N <sub>2</sub> O molecule |
| 5d   | CuL(4I-An)           | 25-240                | 45.57(45.87)               | Loss of 4-iodoaniline, CO and NO                      |
|      |                      | 240-390               | 30.41(29.29)               | Loss of CO, CO <sub>2</sub> and NO <sub>2</sub>       |
| 5e   | CuL(An)              | 25-240                | 24.52(24.00)               | Loss of aniline and one CH <sub>3</sub> molecule      |
|      |                      | 240-370               | 31.26(32.85)               | Loss of CO, NO and NO <sub>2</sub>                    |
| 5f   | CuL(Benzhydrylamine) | 25-160                | 12.06(11.73)               | Loss of two CH <sub>3</sub> OH molecule               |
|      |                      | 160-330               | 52.09(52.12)               | Loss of benzhydrylamine, and two NO molecule          |

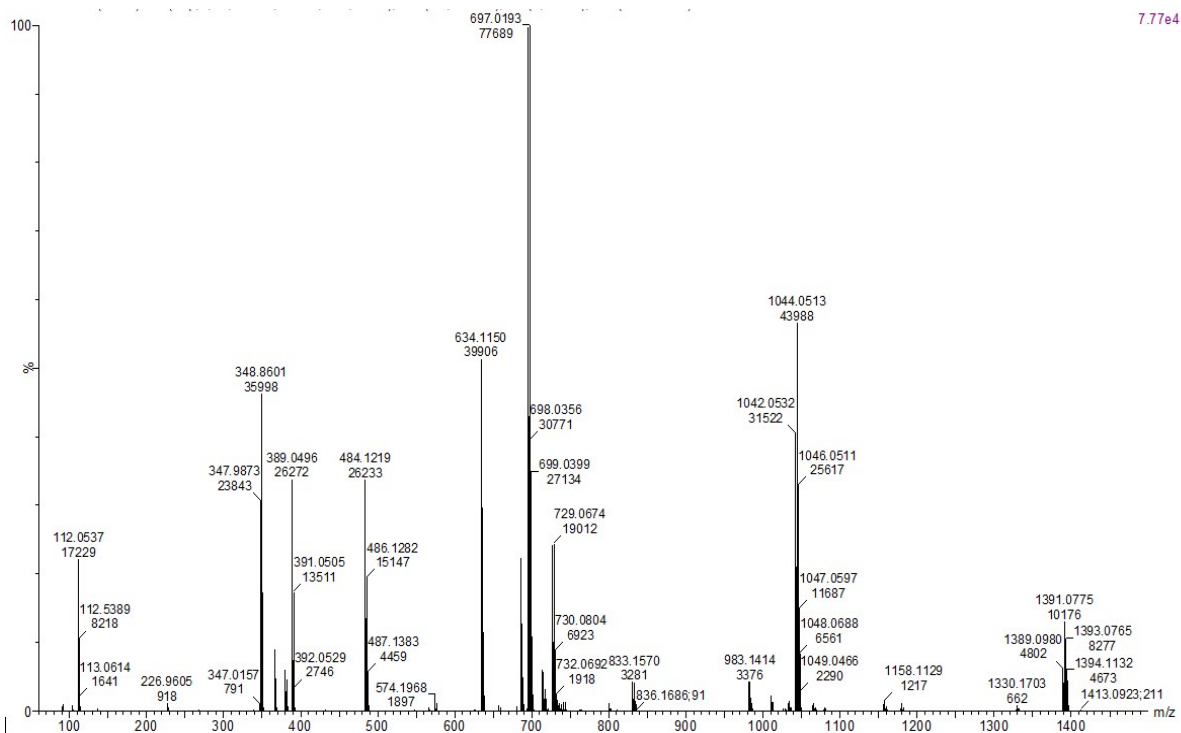

Figure S1(a): Whole HRMS spectrum of copper complex 5a.

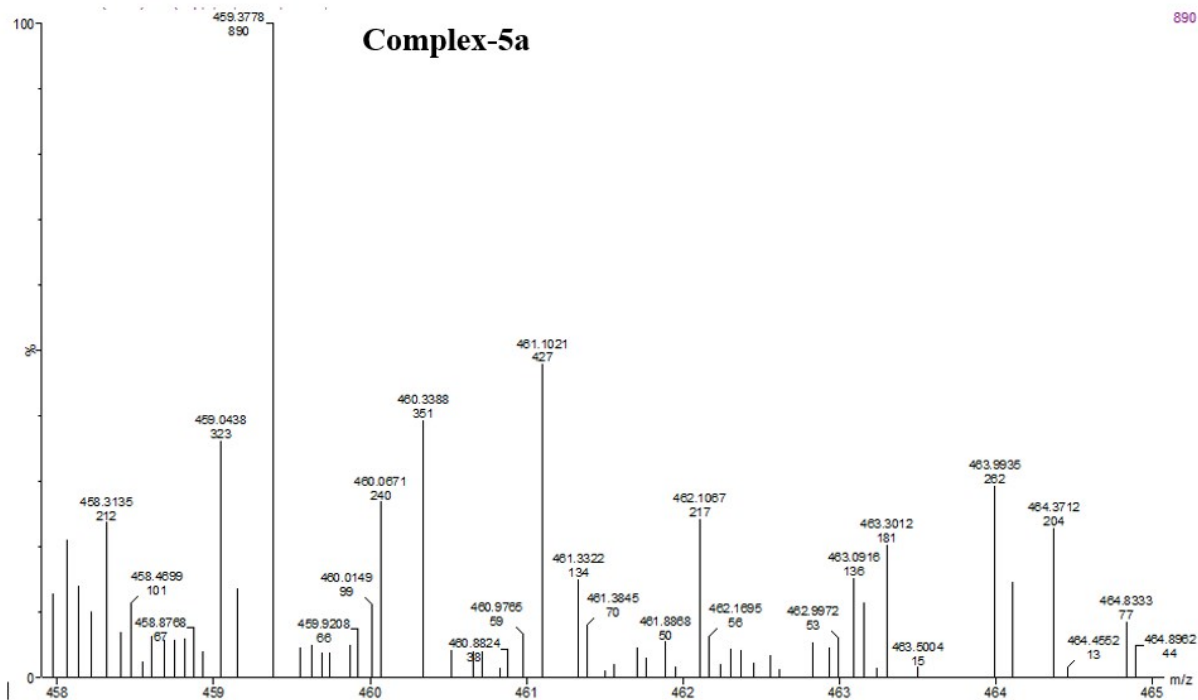

Figure S1(b): Partial HRMS spectrum of copper complex 5a.

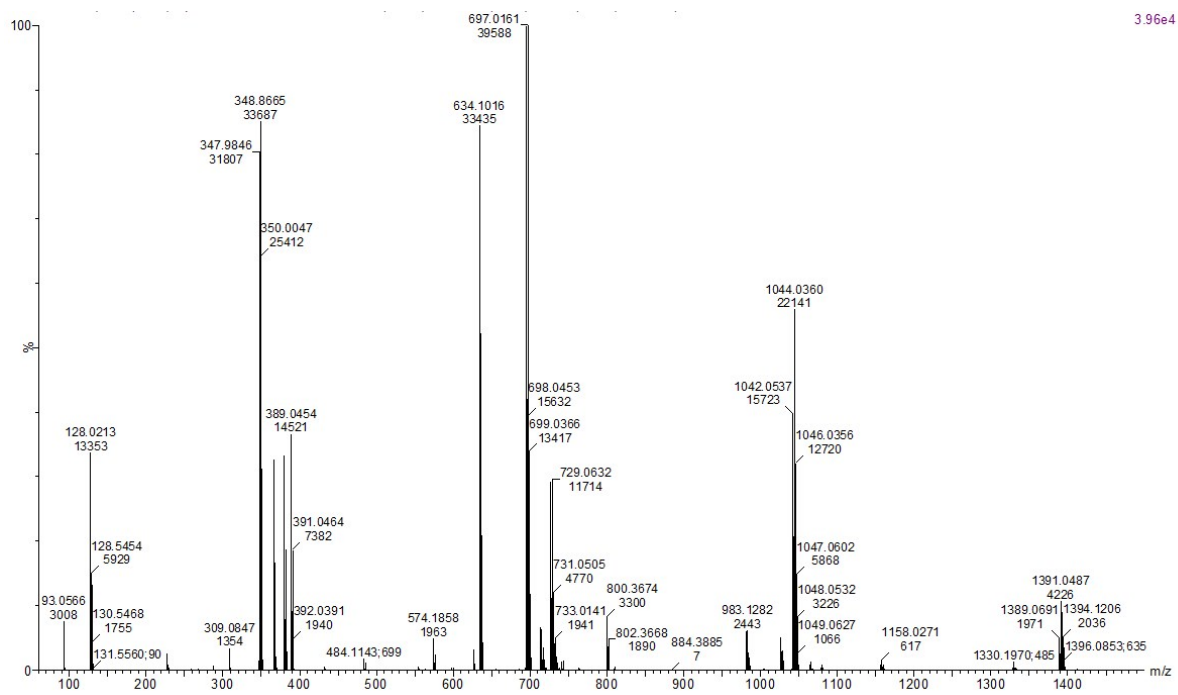

Figure S2(a): Whole HRMS spectrum of copper complex **5b**.

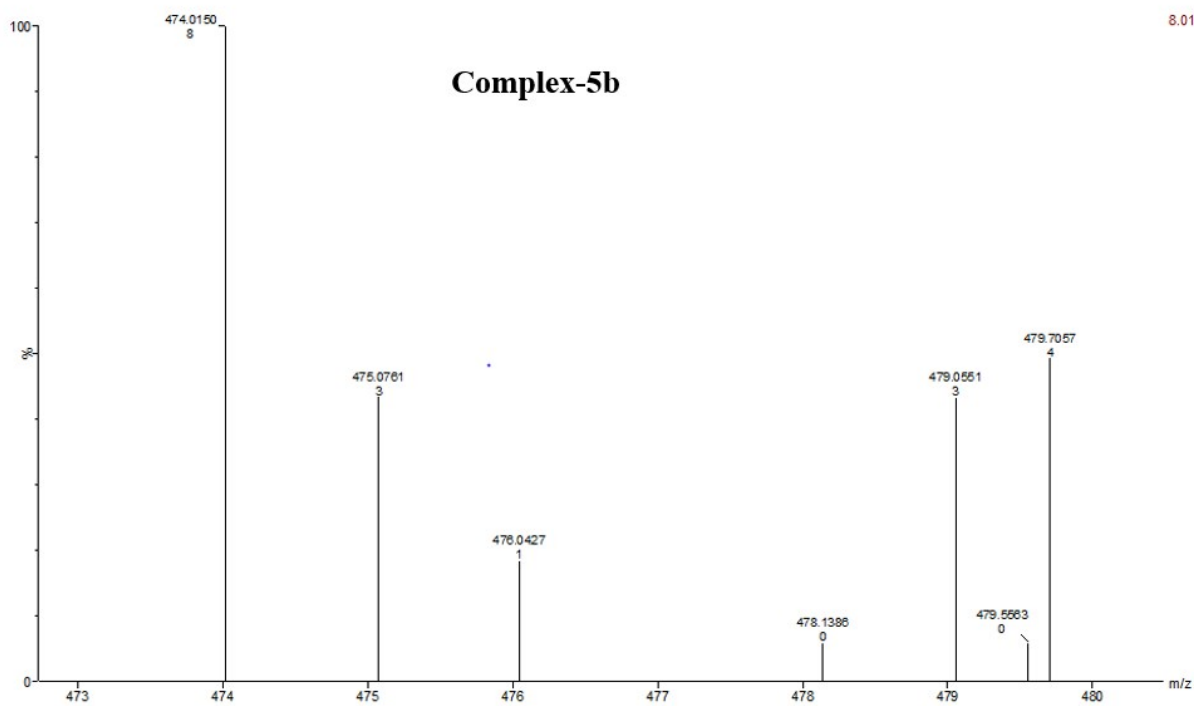

Figure S2(b): Partial HRMS spectrum of copper complex **5b**.





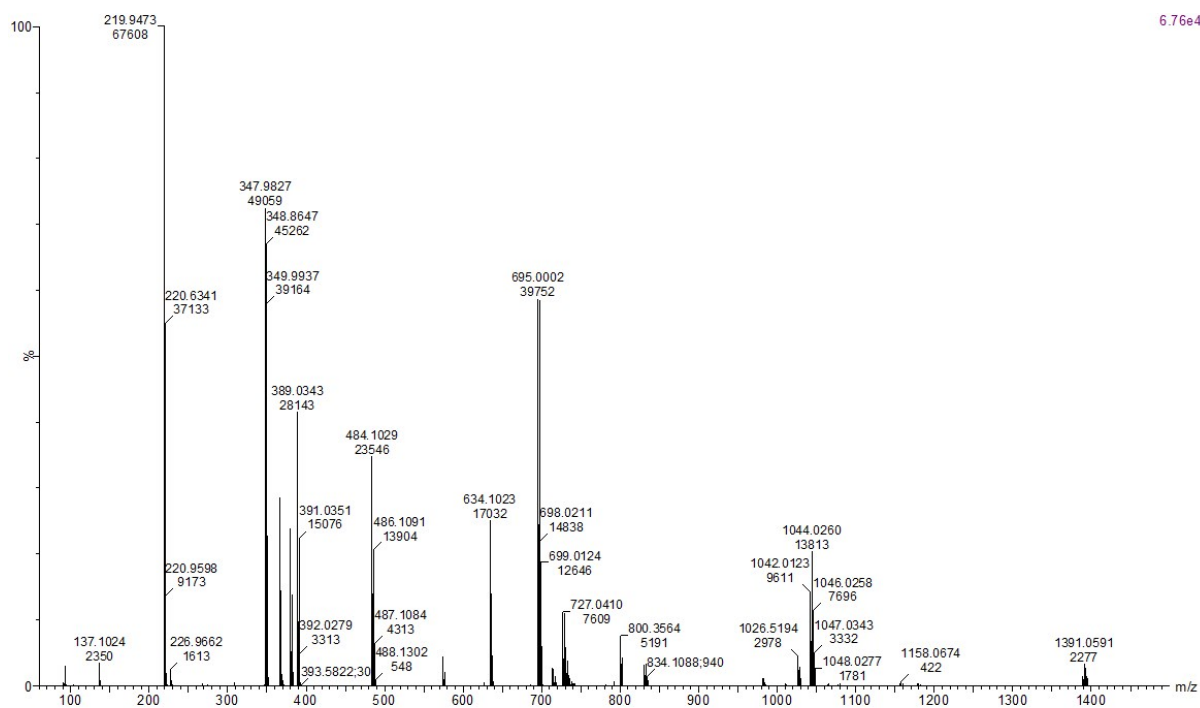

Figure S4(a): Whole HRMS spectrum of copper complex 5d.

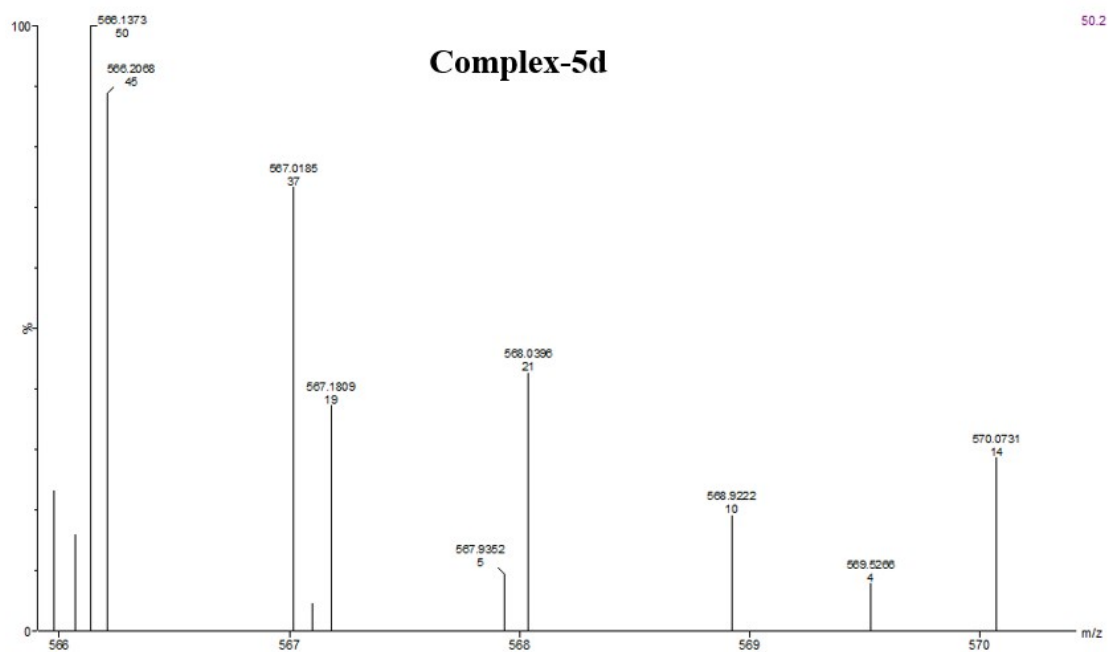

Figure S4(b): Partial HRMS spectrum of copper complex 5d.

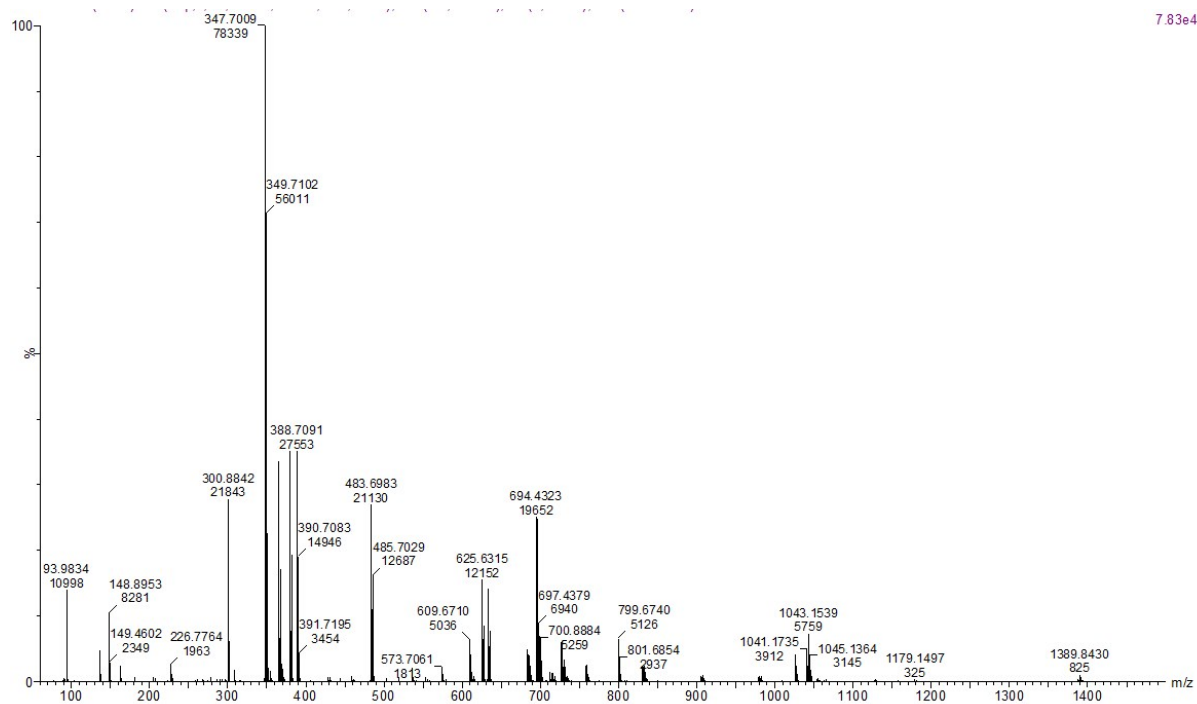

Figure S5(a): Whole HRMS spectrum of copper complex 5e.

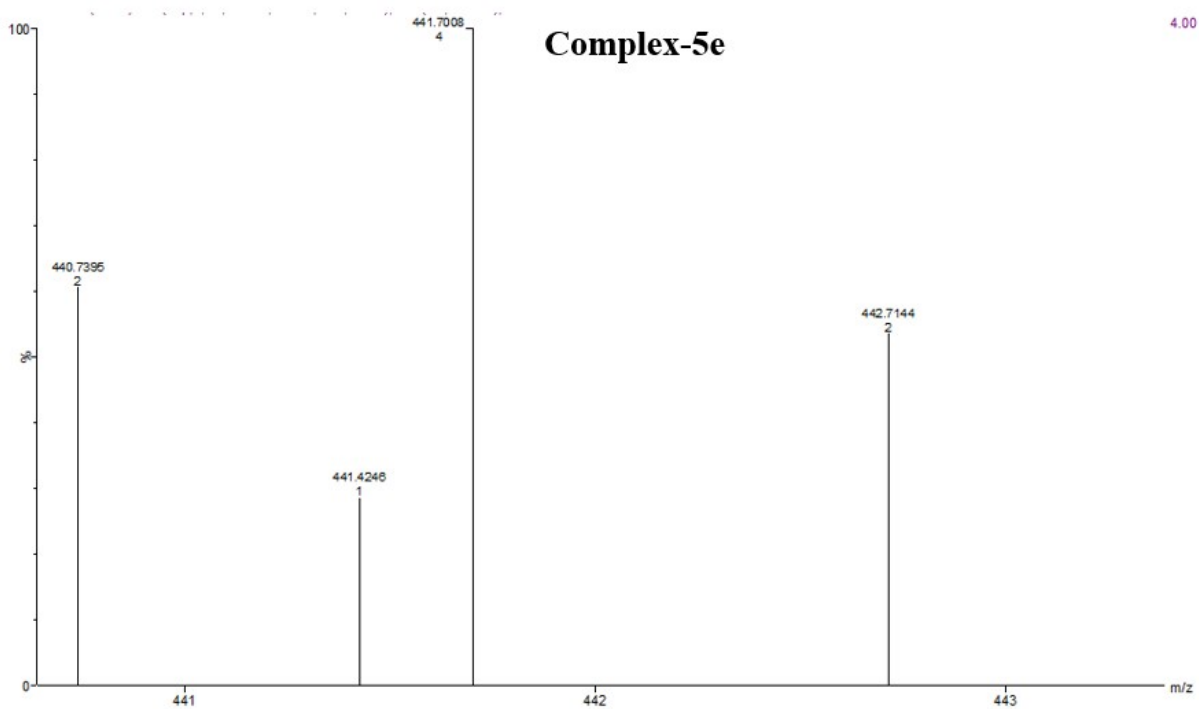

Figure S5(b): Partial HRMS spectrum of copper complex 5e.

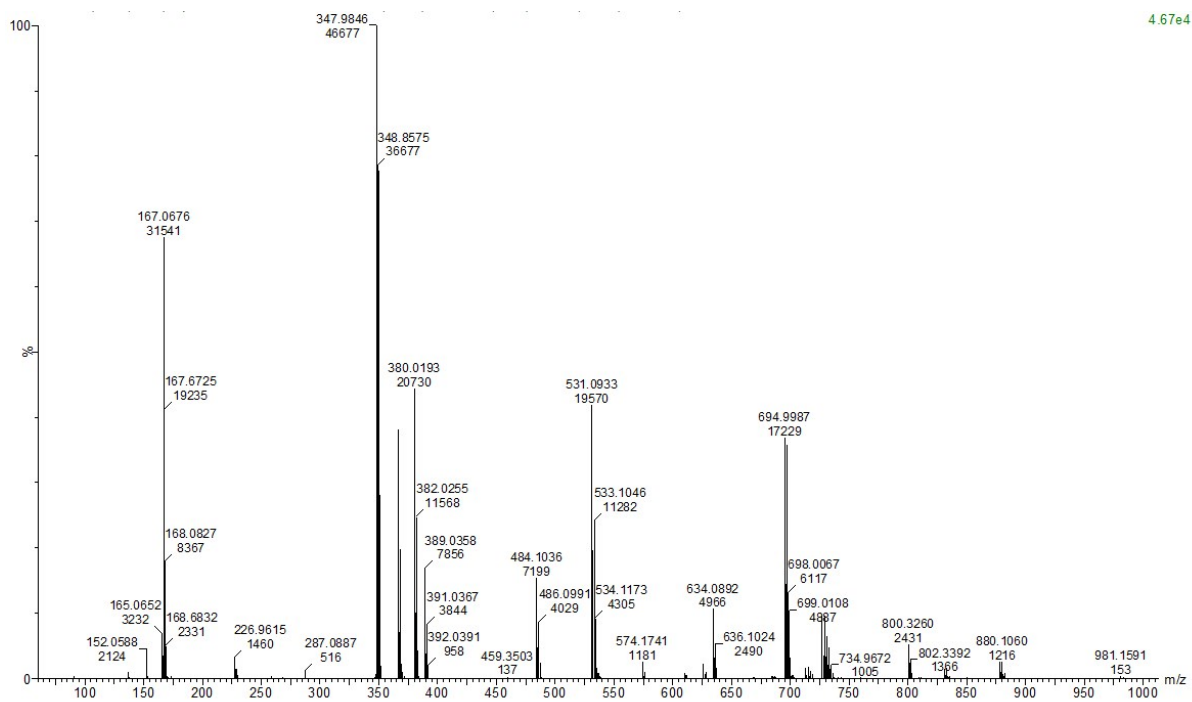

Figure S6(a): Whole HRMS spectrum of copper complex **5f**.

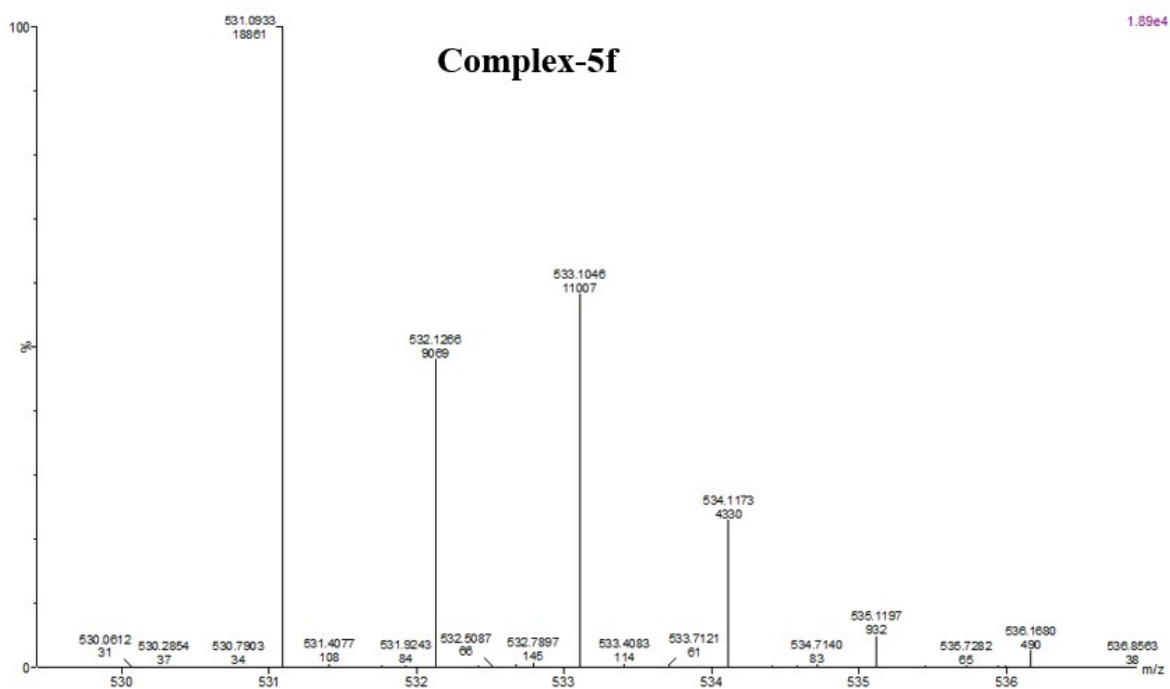

Figure S6(b): Partial HRMS spectrum of copper complex **5f**.

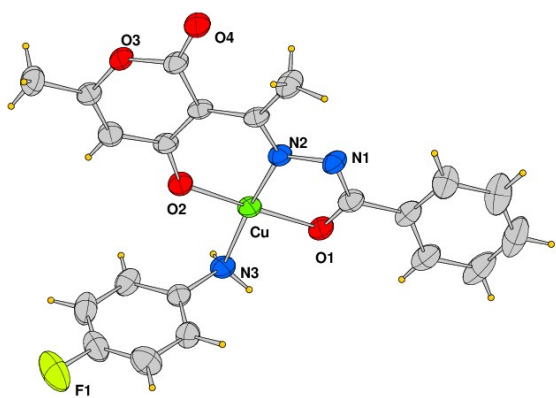

5a

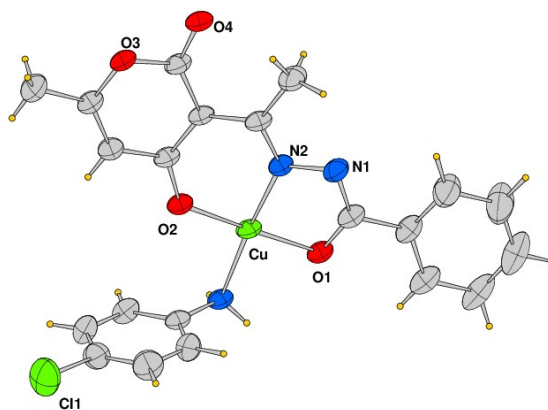

5b

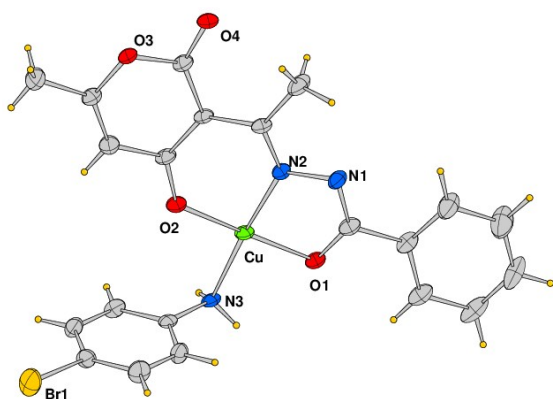

5c

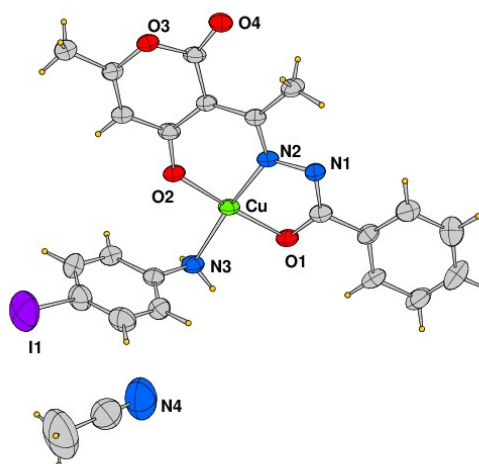

5d

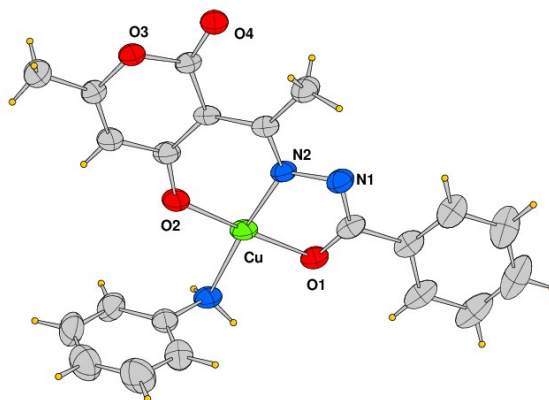

5e

**Figure S7:** Molecular structure of complexes **5a–5e** (ORTEP diagrams with ellipsoid probability at 50%).

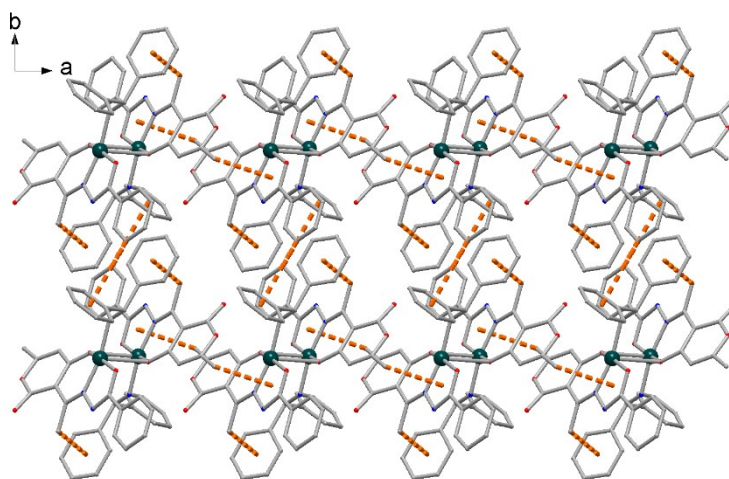

**Figure S8:** 3D architecture viewed down axis *c* in the crystal packing of **5f** built by C-H... $\pi$ -ring interactions (parameters reported in Table 5S).

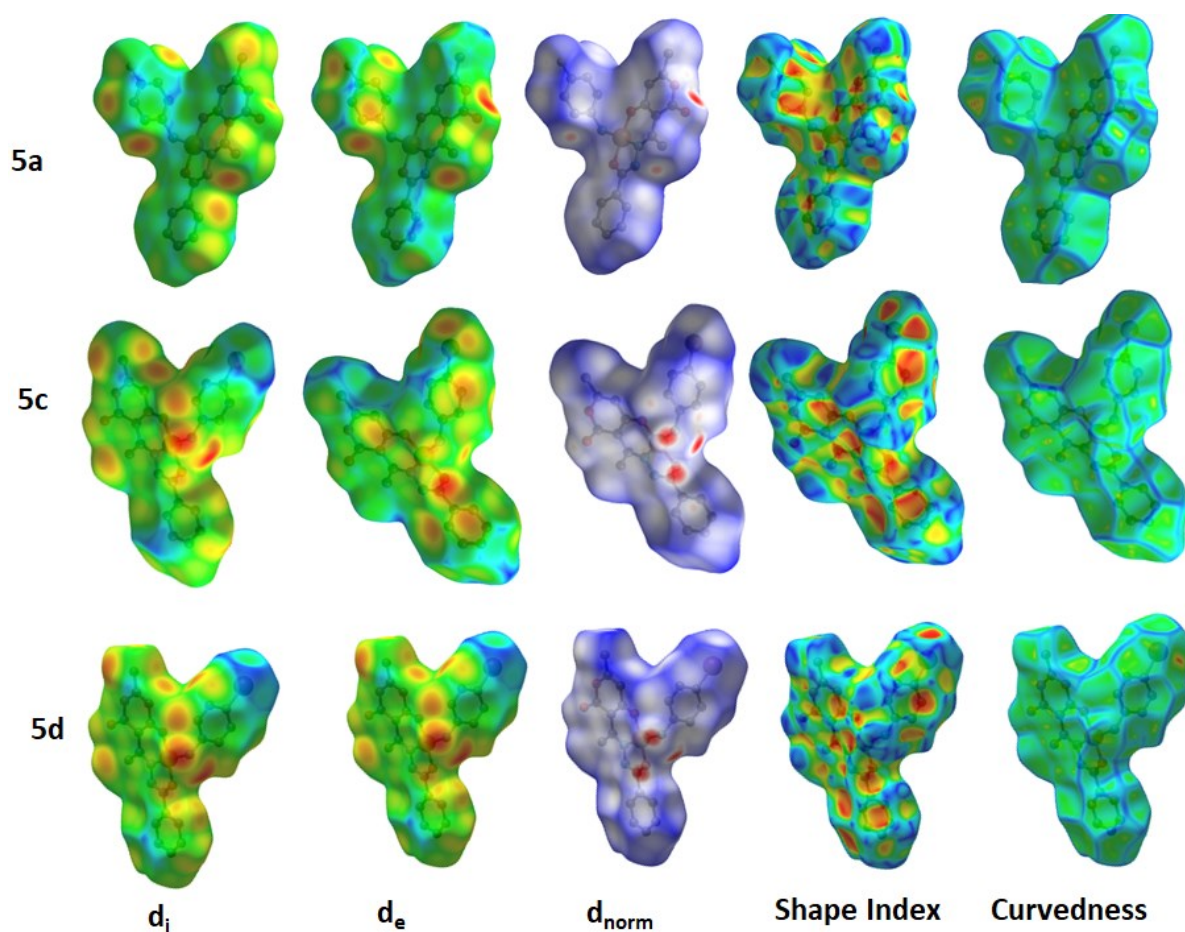

**Figure S9:** Hirshfeld surface analysis of complexes **5a**, **5c** and **5d**.



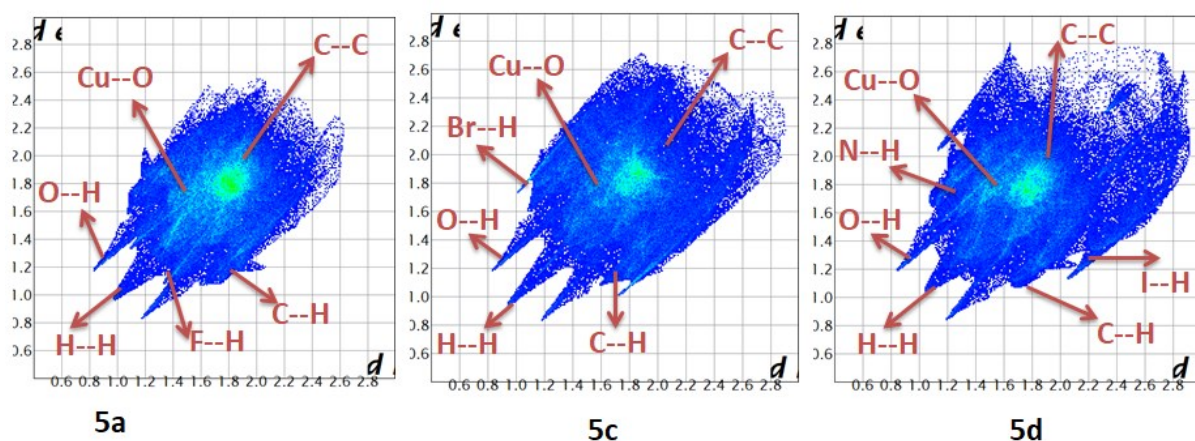

**Figure S10:** 2D fingerprint plots for complexes **5a**, **5c** and **5d**.

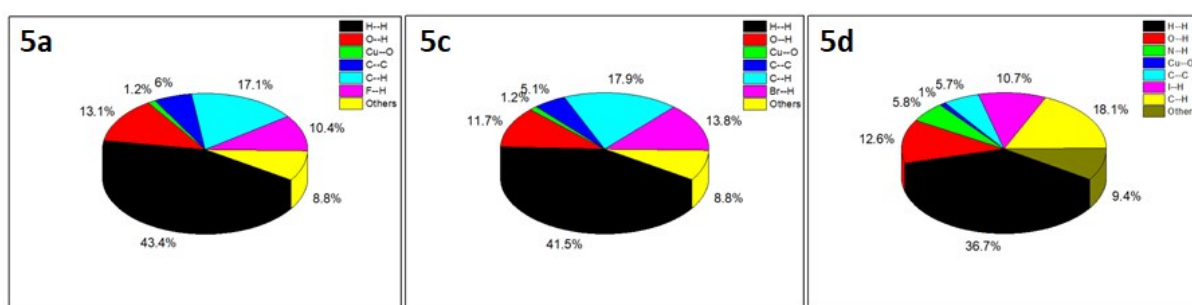

**Figure S11:** Relative percentage contributions of several intermolecular interactions on the Hirshfeld surface area of these complexes.

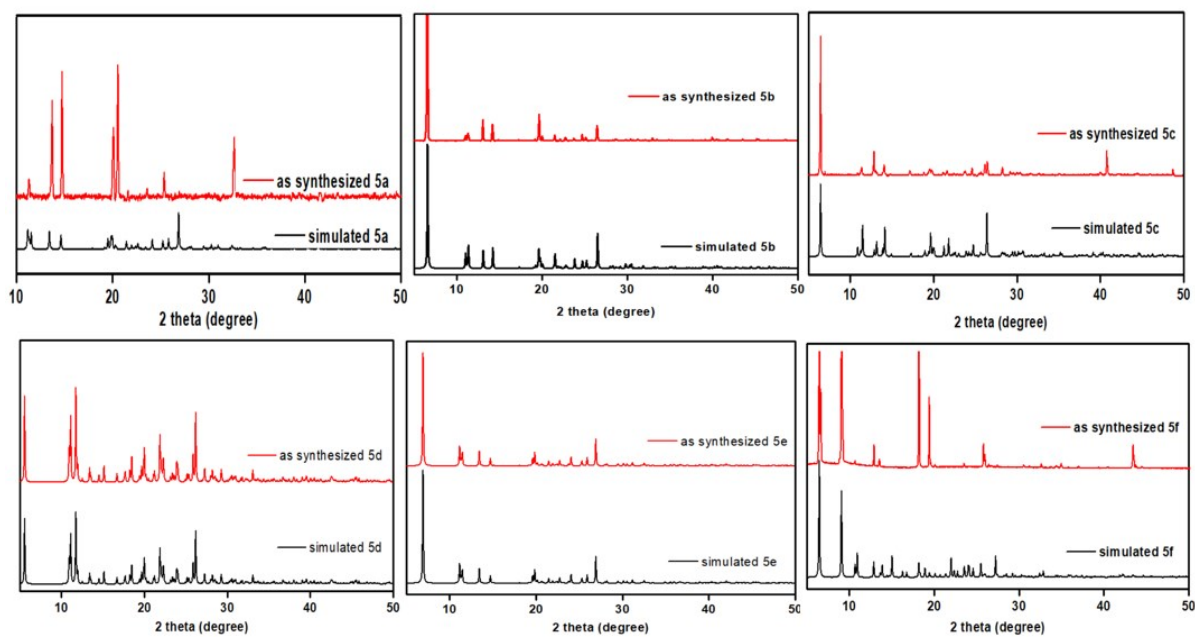

**Figure S12:** Powder XRD spectra of **5a-5f** complexes.

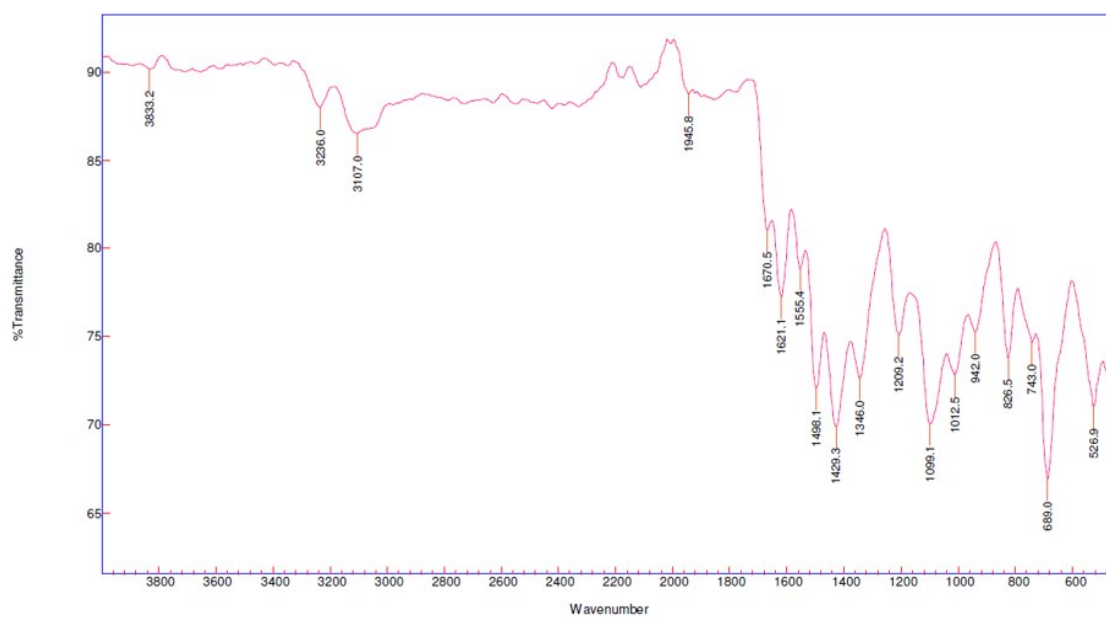

**Figure S13 (a):** FT-IR spectrum of complex  $[\text{CuL}(4\text{F-An})]$  (**5a**).

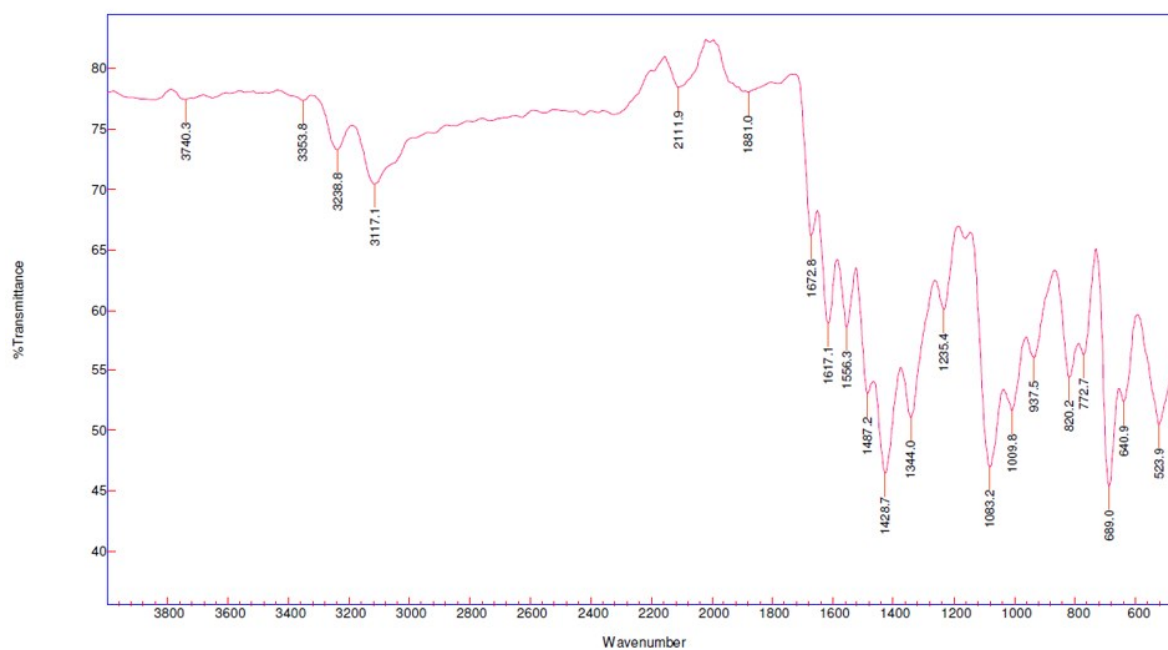

**Figure S13 (b):** FT-IR spectrum of complex  $[\text{CuL}(4\text{Cl-An})]$  (**5b**).



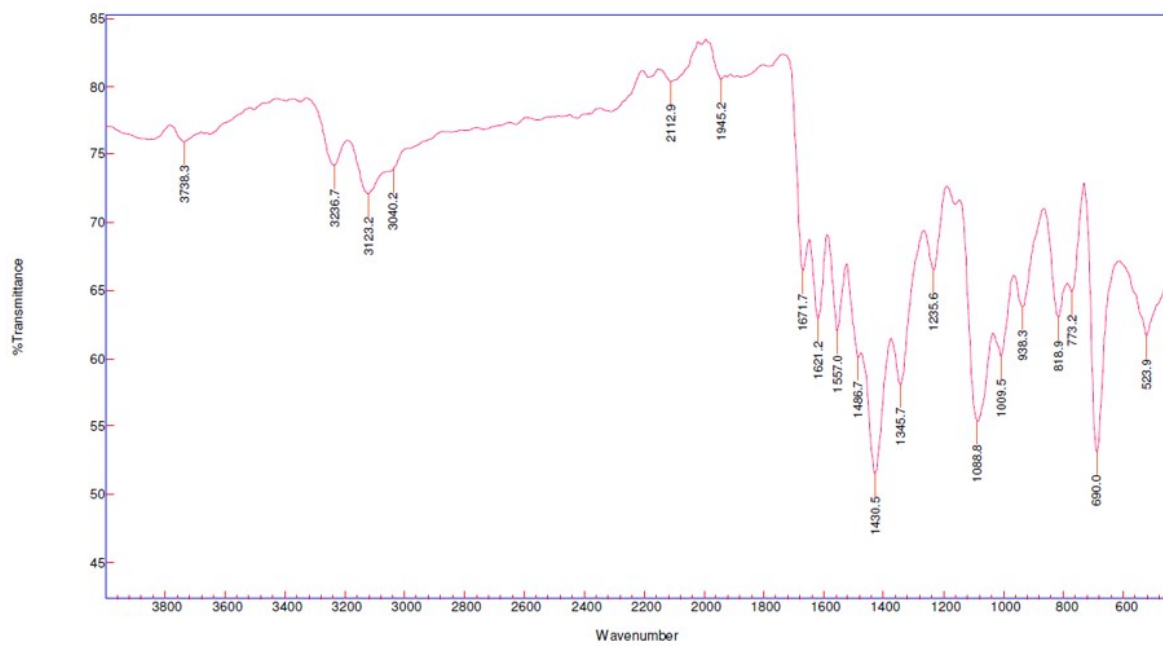

**Figure S13 (c):** FT-IR spectrum of complex [CuL(4Br-An)] (5c).

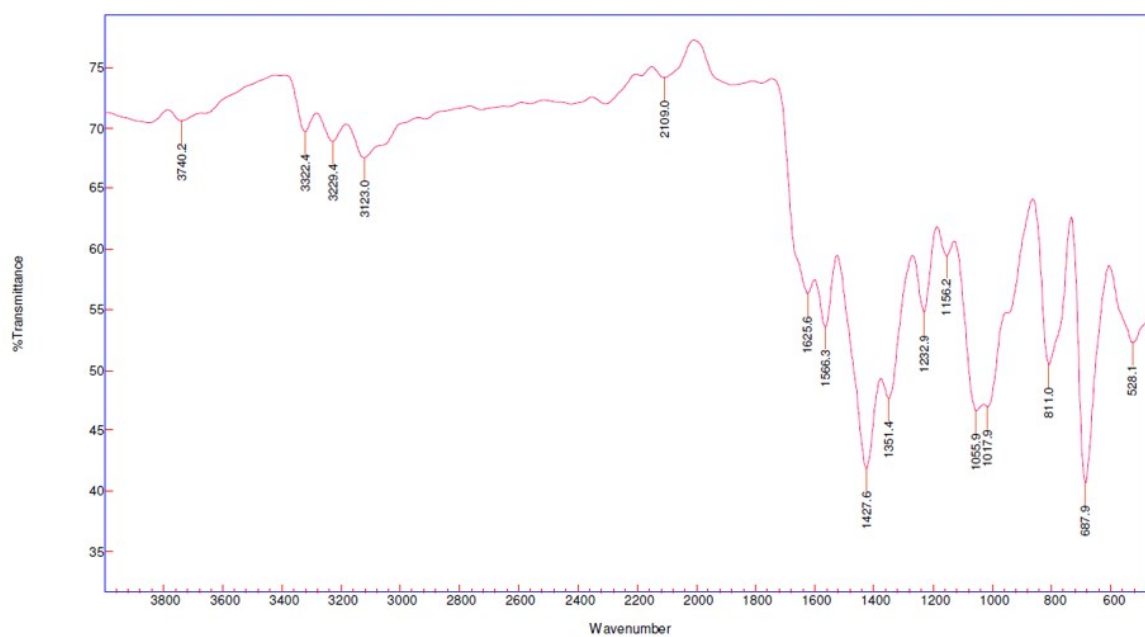

**Figure S13 (d):** FT-IR spectrum of complex [CuL(4I-An)] (5d).

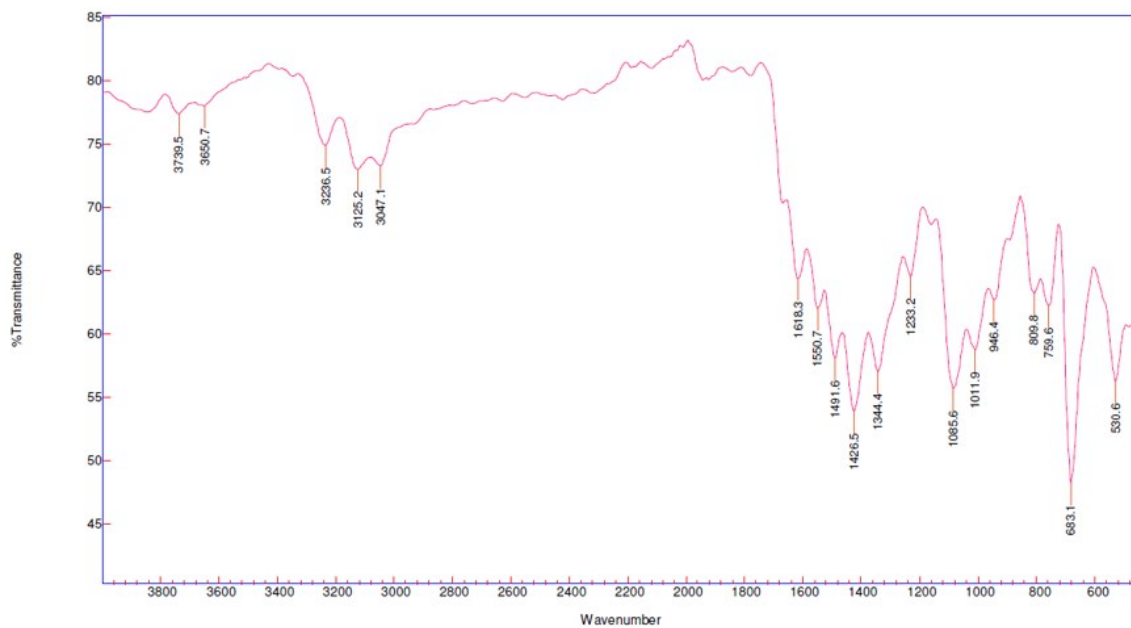

**Figure S13 (e):** FT-IR spectrum of complex [CuL(An)] (5e).

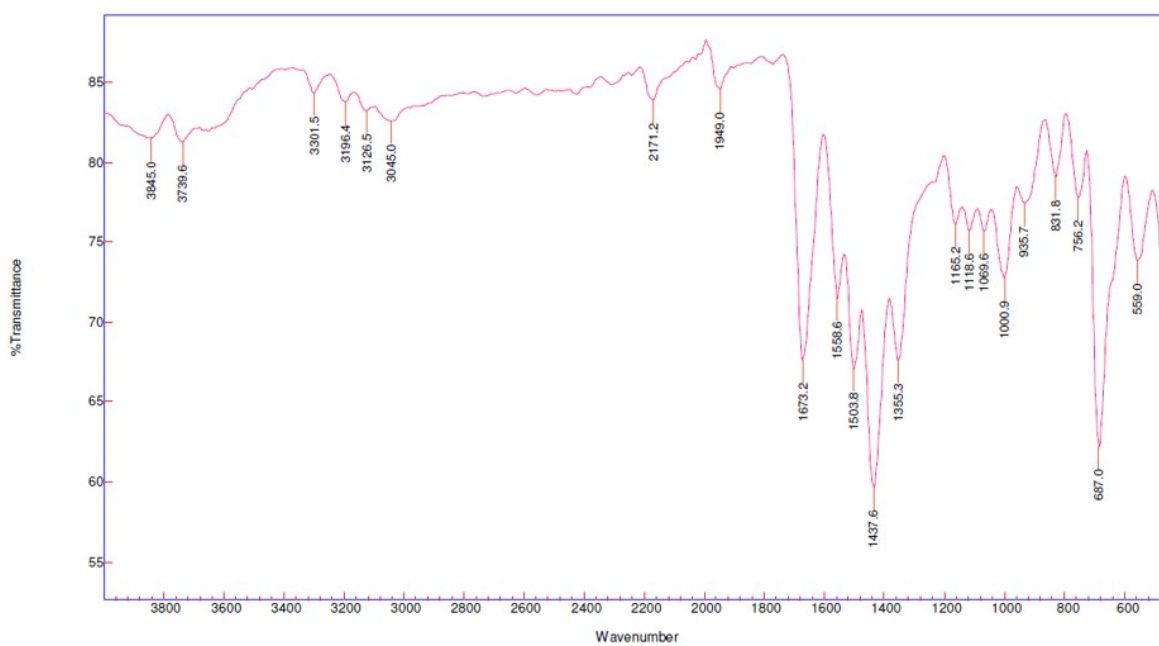

**Figure S13 (f):** FT-IR spectrum of complex [CuL(Benzhydramine)] (5f).

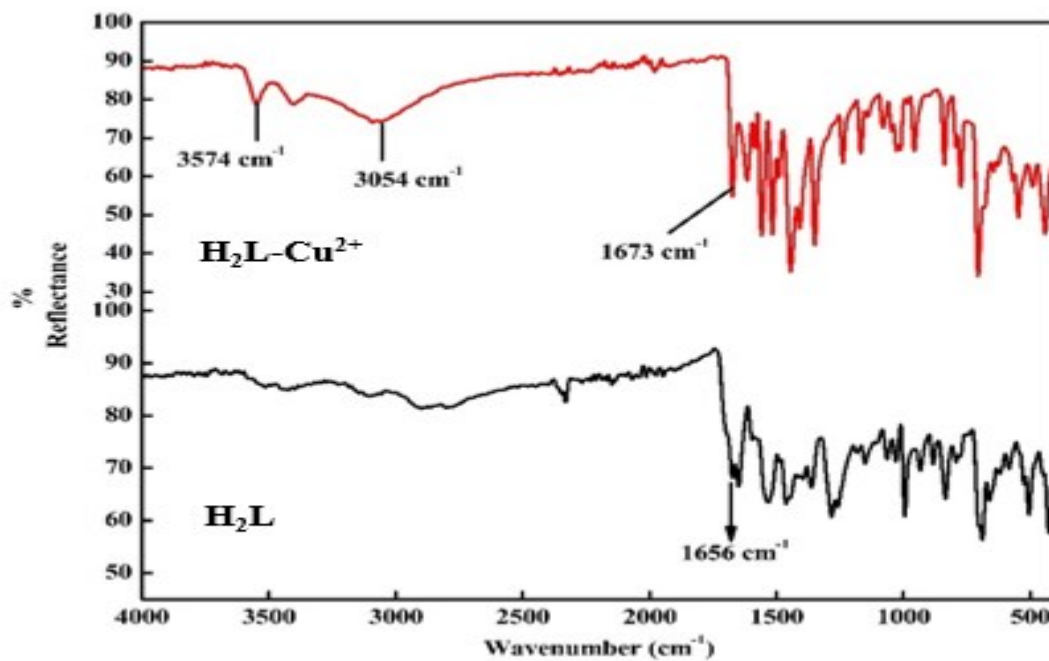

Fig

ure S13 (g): FT-IR spectra of synthesized ligand  $\text{H}_2\text{L}$  and complex  $\text{H}_2\text{L-Cu}^{2+}$ .

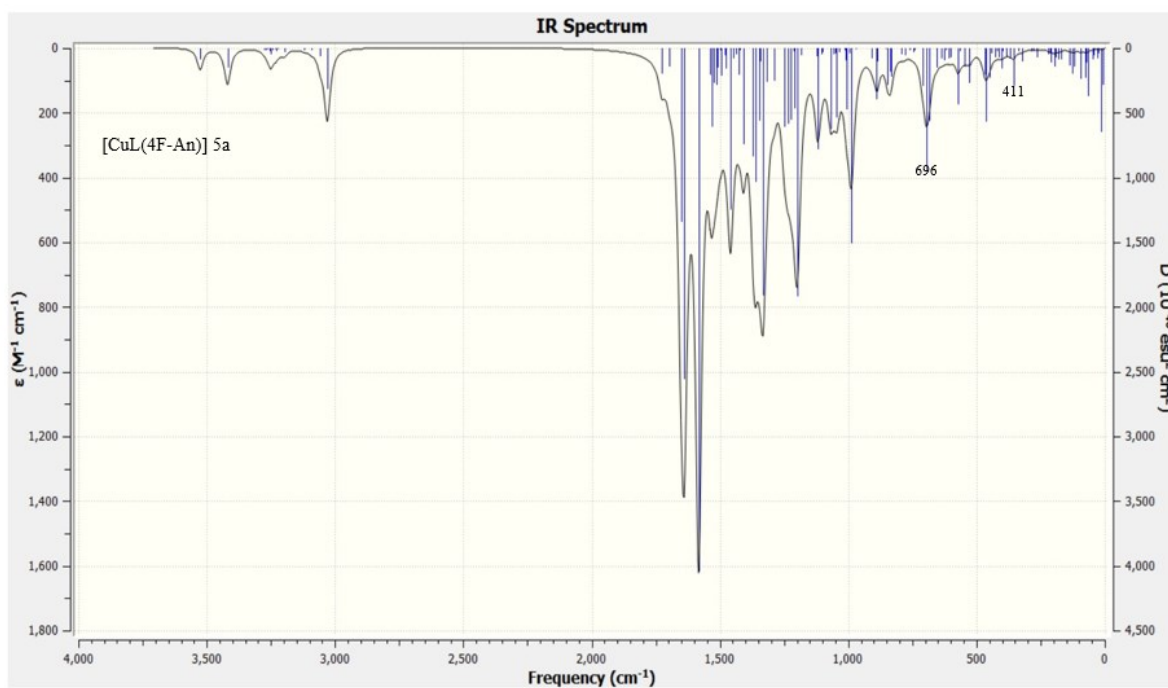

Figure S13 (h): Computed FT-IR spectrum of complex  $[\text{CuL}(4\text{F-An})]$  (5a).

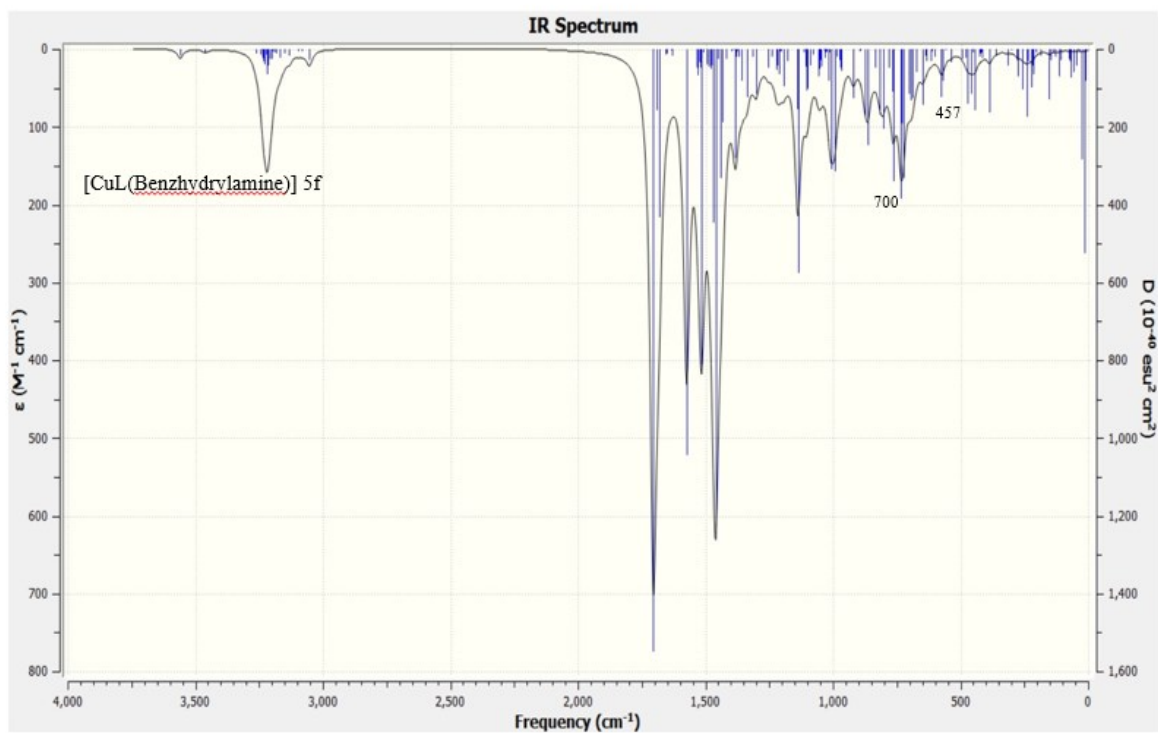

Figure S13 (i): Computed FT-IR spectrum of complex [CuL(Benzhydrilamine)] (5f).

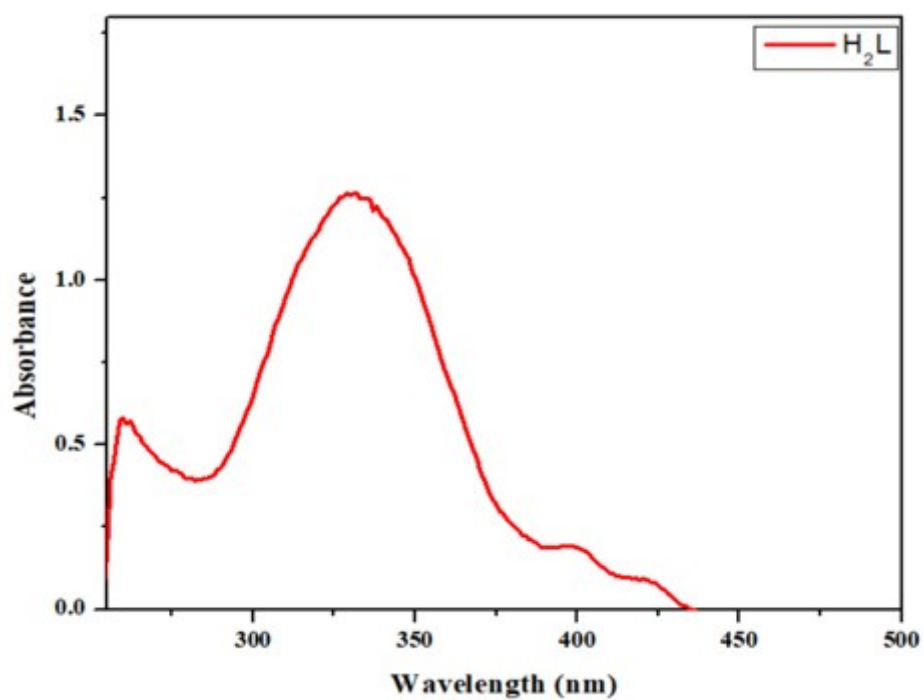

Figure S14 (a): UV- vis spectrum of ligand  $\text{H}_2\text{L}$ .

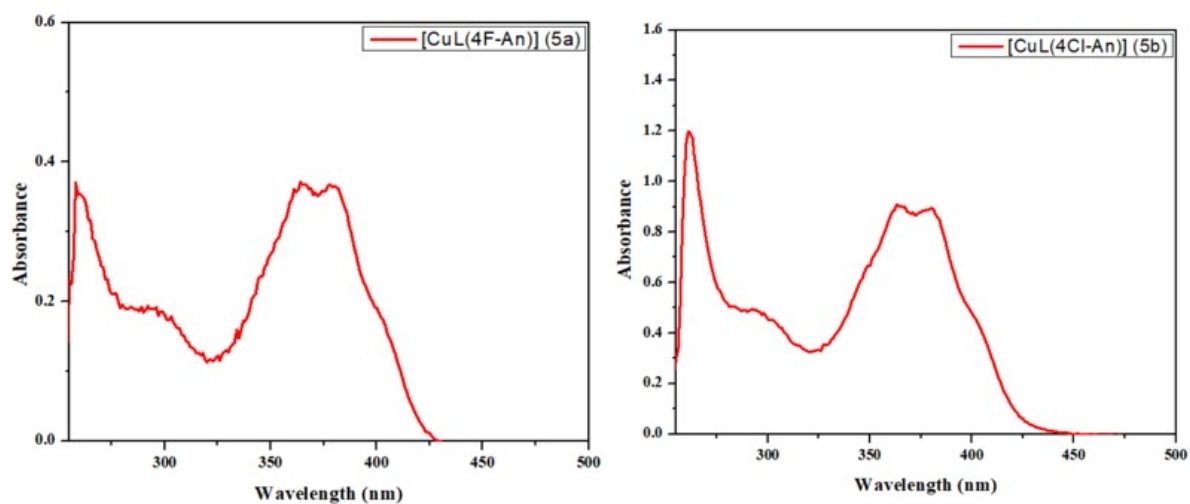

**Figure S14 (b):** UV- vis spectra of synthesized complexes **5a** and **5b**.

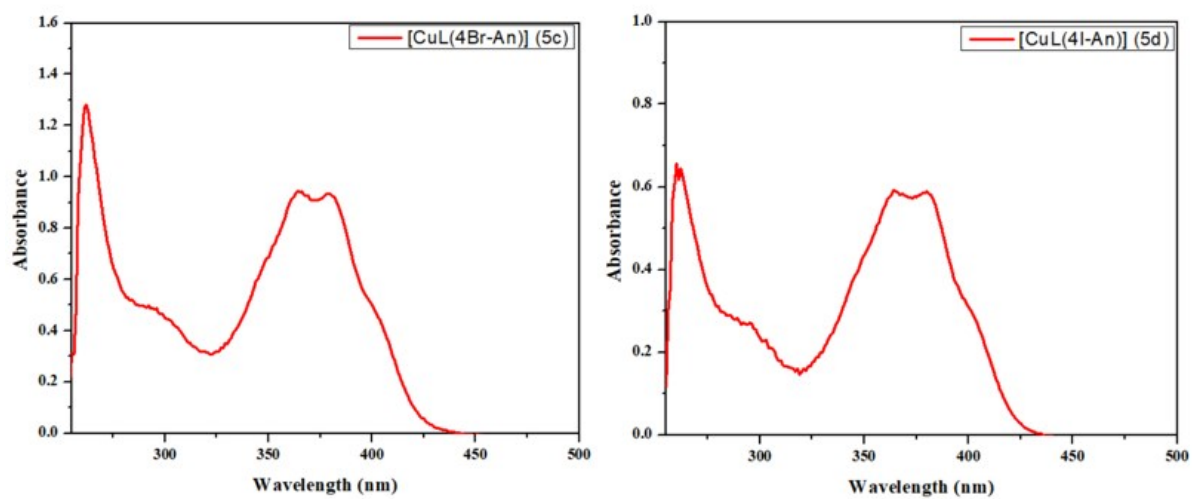

**Figure S14 (c):** UV- vis spectra of synthesized complexes **5c** and **5d**.

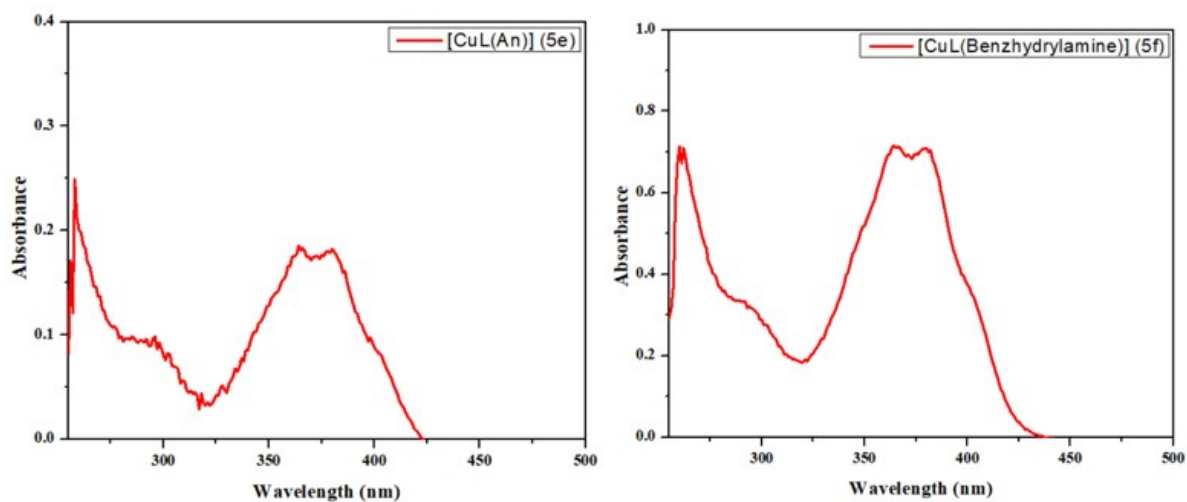

**Figure S14 (d):** UV- vis spectra of synthesized complexes **5e** and **5f**.

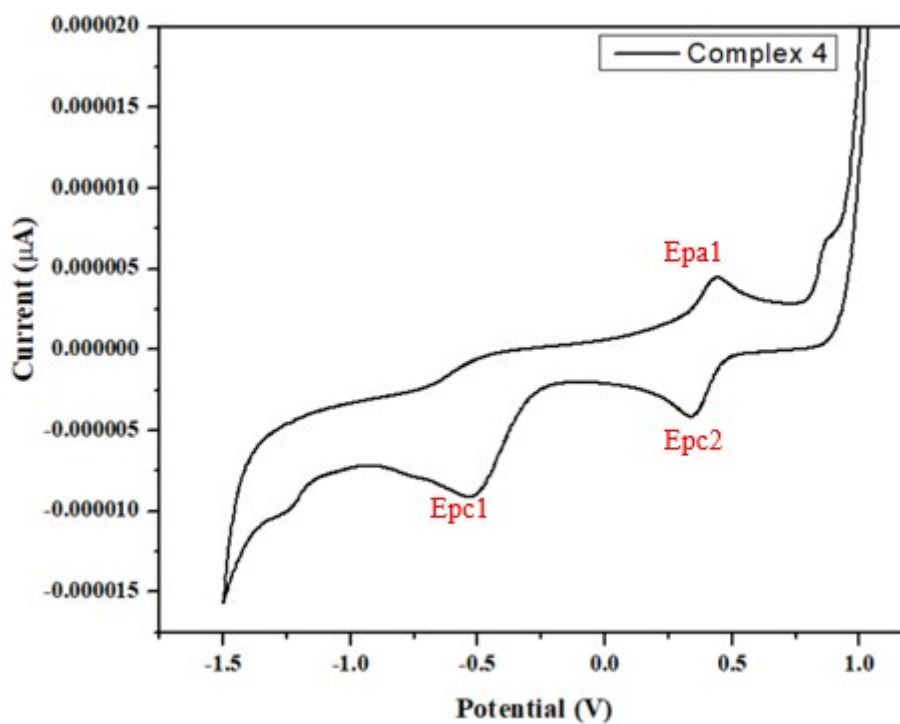

**Figure S15 (a):** Cyclicvoltammetric response of complex **4** using 0.05 M KCl solution at scan rate of 25 mV/sec.

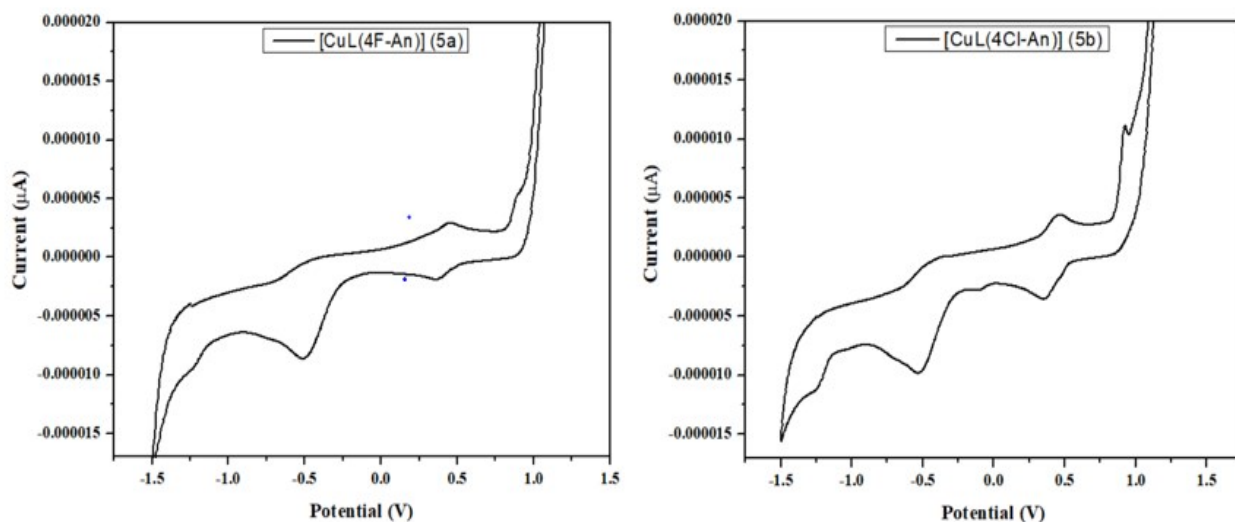

**Figure S15 (b):** Cyclic voltammetric response complexes **5a** and **5b** using 0.05 M KCl solution at scan rate of 25 mV/sec.

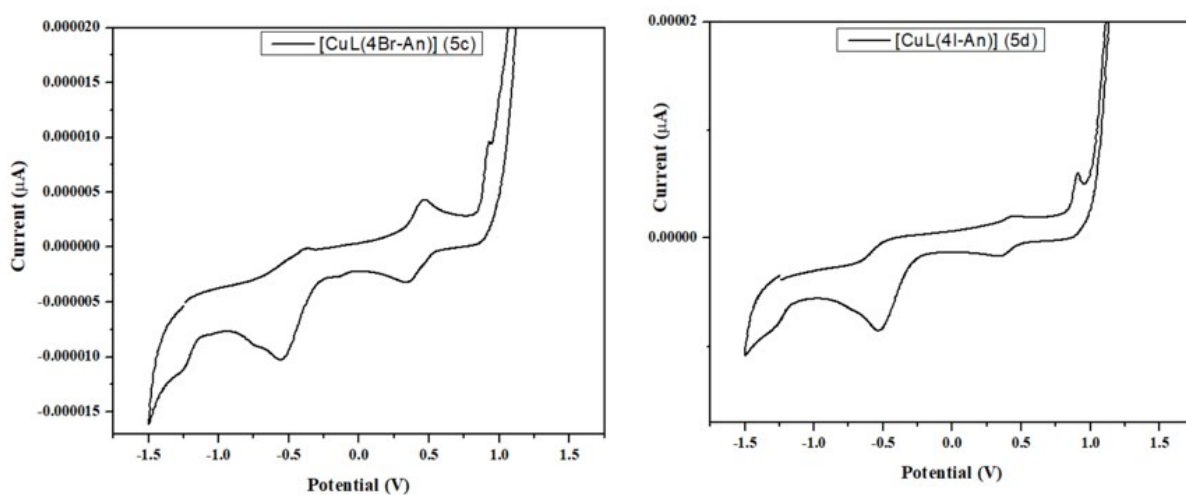

**Figure S15 (c):** Cyclic voltammetric response complexes **5c** and **5d** using 0.05 M KCl solution at scan rate of 25 mV/sec.

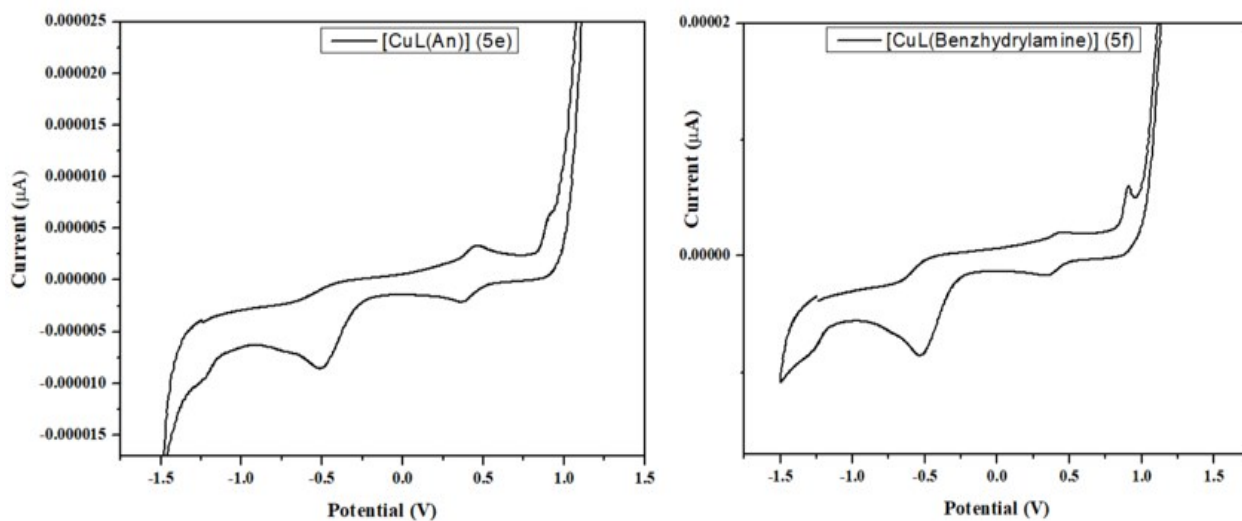

**Figure S15 (d):** Cyclicvoltammetric response complexes **5e** and **5f** using 0.05 M KCl solution at scan rate of 25 mV/sec.

‡ All the potentials are referenced to Ag/AgCl electrode.



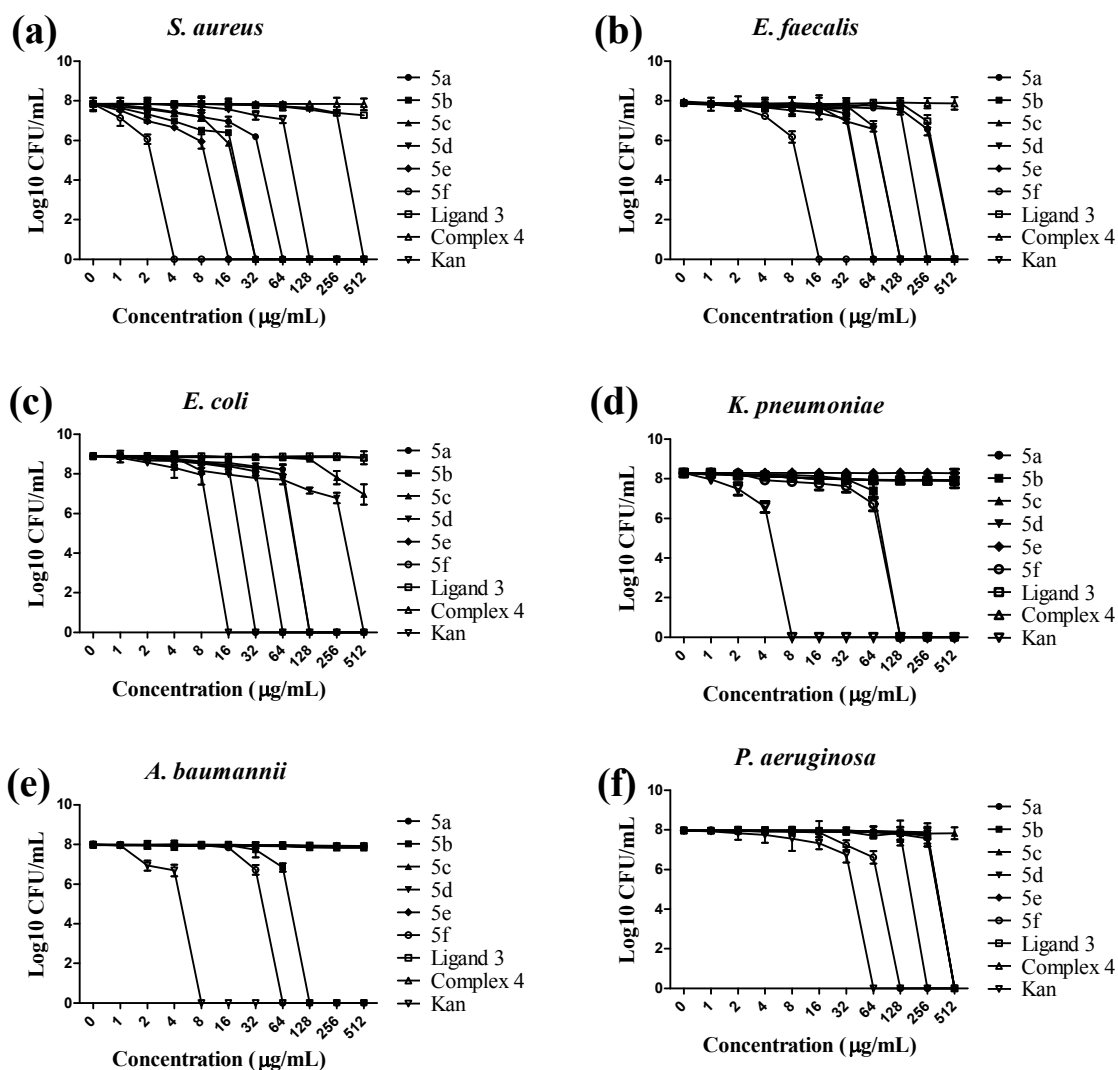

**Figure S16:** Log CFU/mL of all bacteria used in the study in the presence of various concentration of complexes **4**, **5a-5f**, ligand (**3**) and Kanamycin as comparison after 24h of treatment. Data represent mean±SD for all data point. Each experiment was performed at least twice in duplicate.

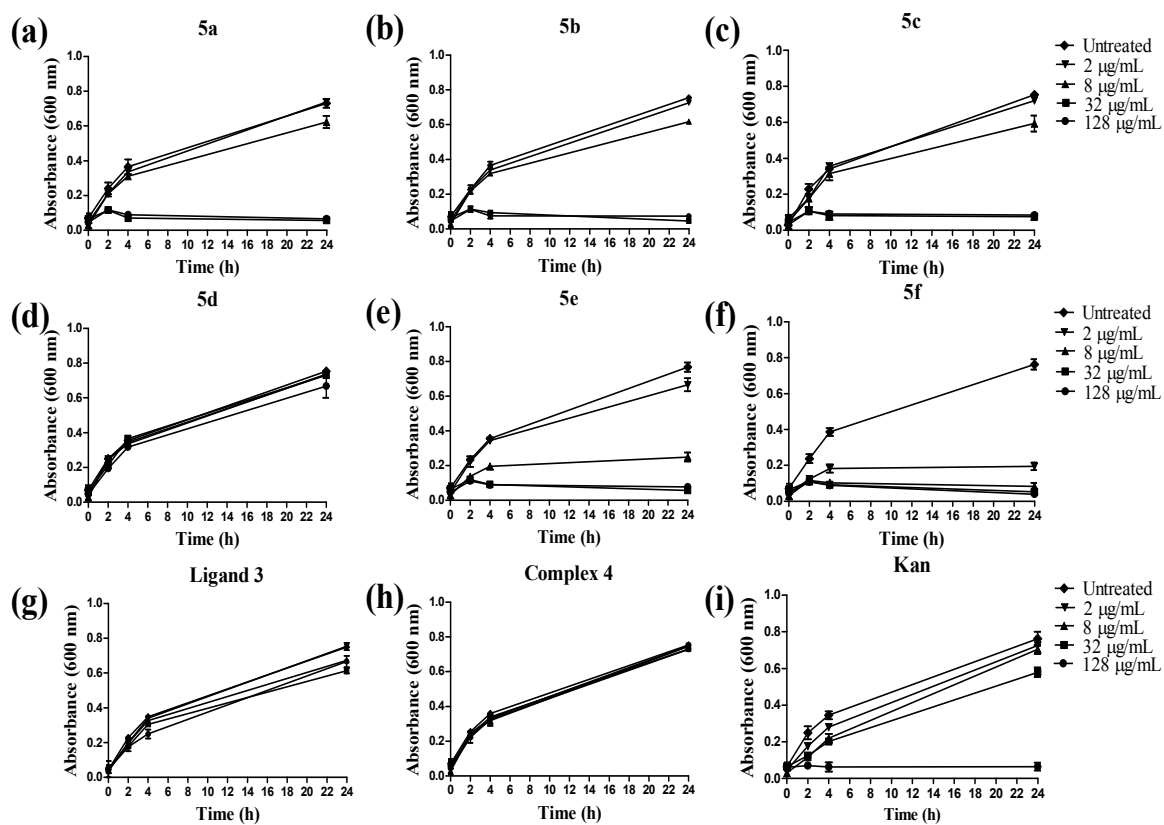

**Figure S17:** Impact on growth of *S. aureus* in the presence of various concentrations of compounds used in this study. Data represent mean $\pm$ SD for all data point. Each experiment was performed at least twice in duplicate.

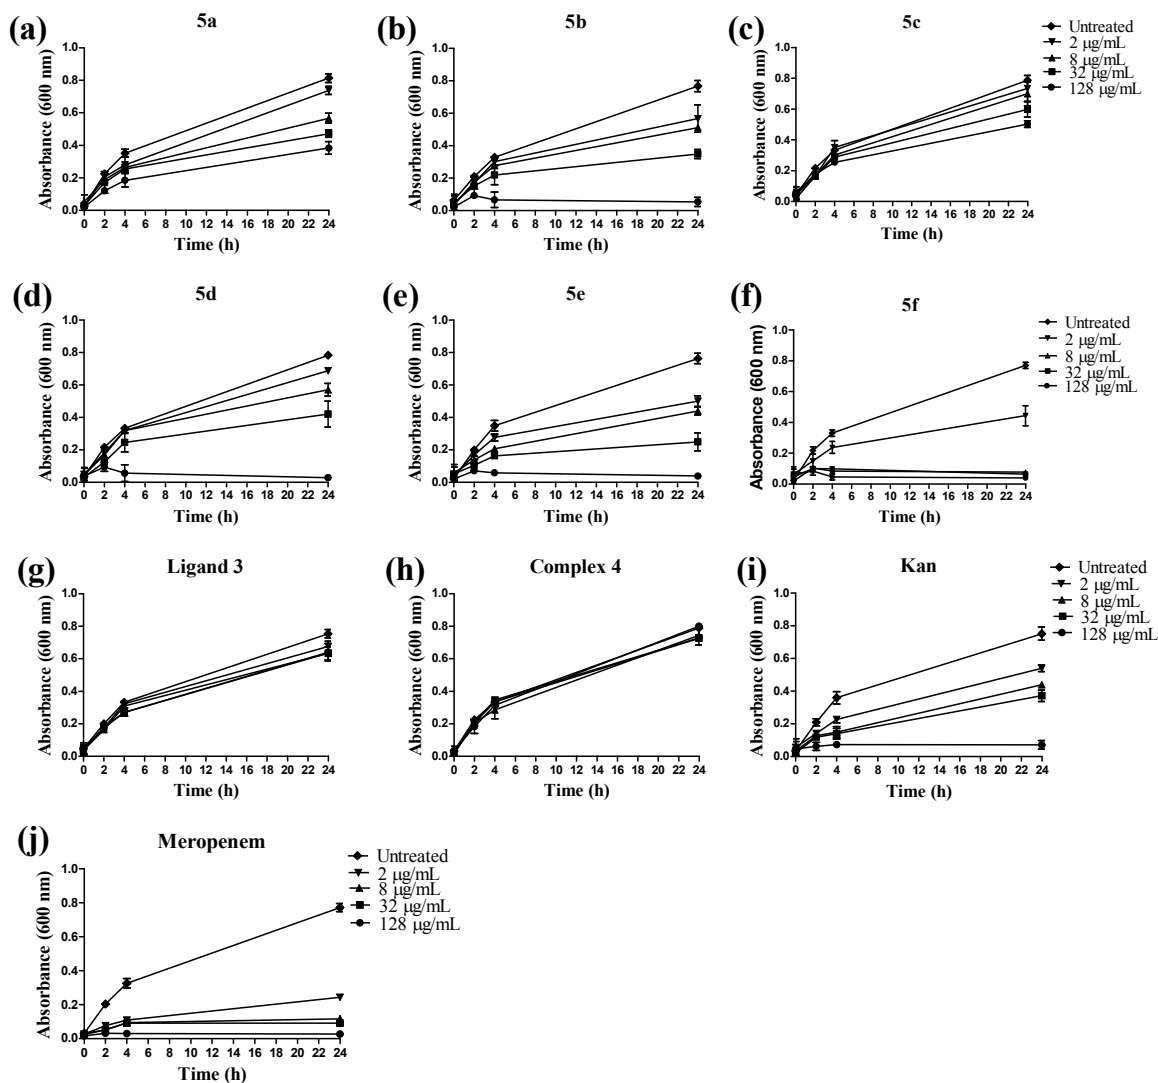

**Figure S18:** Impact on growth of *E. faecalis* in the presence of various concentrations of compounds used in this study. Data represent mean $\pm$ SD for all data point. Each experiment was performed at least twice in duplicate. Meropenem, a third generation antibiotic was also used as control to show that MIC of compound 5f is comparable to this drug.

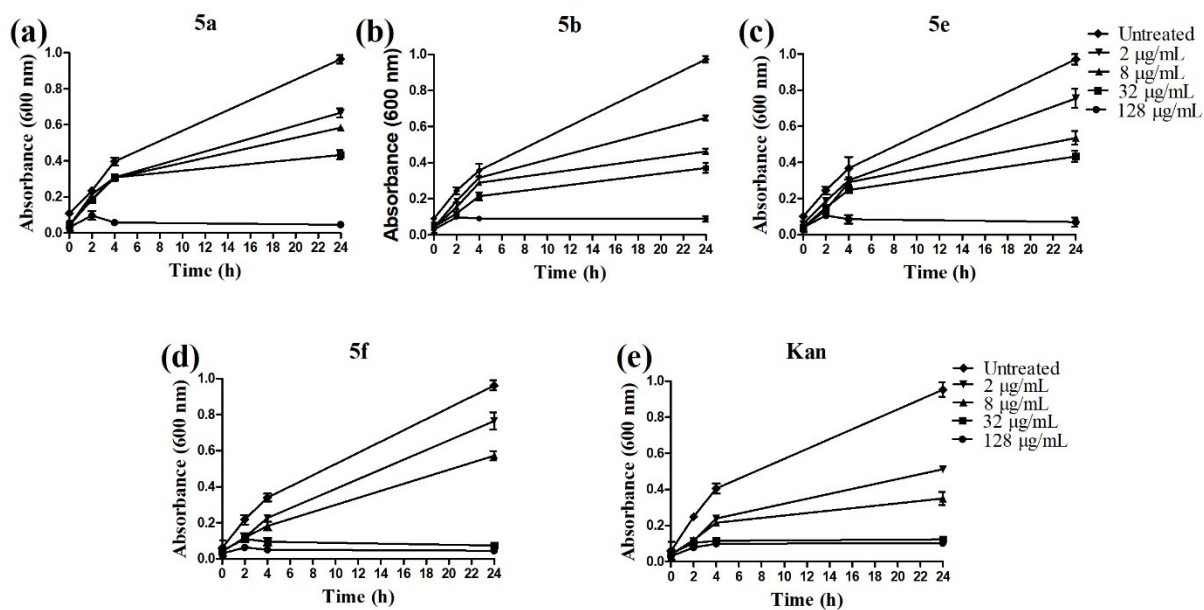

**Figure S19:** Impact on growth of *E. coli* in the presence of various concentrations of compounds used in this study. Data represent mean $\pm$ SD for all data point. Each experiment was performed at least twice in duplicate. Note: No effect on growth in presence of complexes **4**, **5c**, **5d**, and ligand **3**.

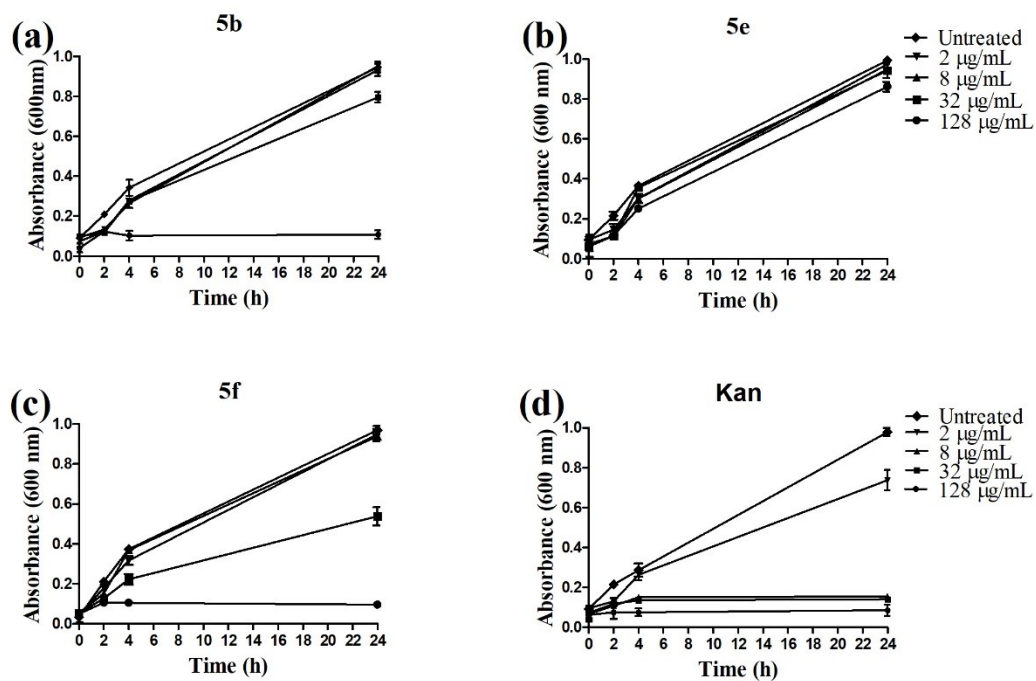

**Figure S20:** Impact on growth of *A. baumannii* in the presence of various concentrations of compounds used in this study. Data represent mean $\pm$ SD for all data point. Each experiment was performed at least twice in duplicate. Note: No effect on growth in presence of complexes **4**, **5a**, **5c**, **5d**, and ligand **3**.

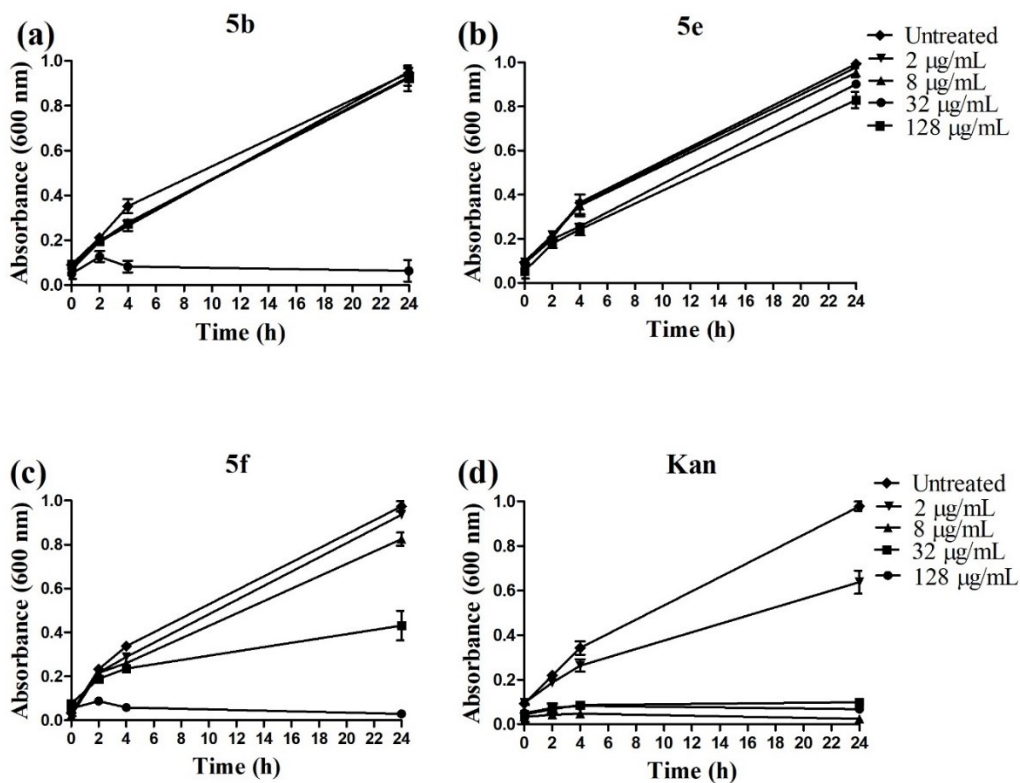

**Figure S21:** Impact on growth of *K. pneumoniae* in the presence of various concentrations of compounds used in this study. Data represent mean $\pm$ SD for all data point. Each experiment was performed at least twice in duplicate. Note: No effect on growth in presence of complexes 4, 5a, 5c, 5d, and ligand 3.

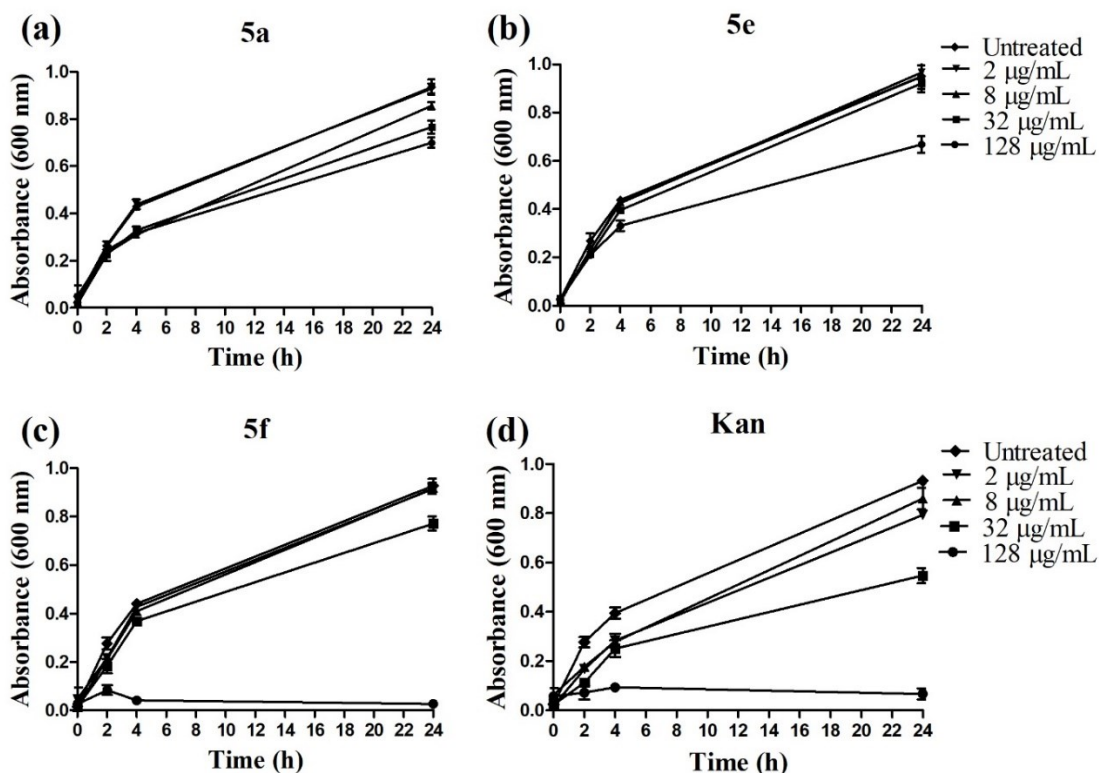

**Figure S22:** Impact on growth of *P. aeruginosa* in the presence of various concentrations of compounds used in this study. Data represent mean $\pm$ SD for all data point. Each experiment was performed at least twice in duplicate. Note: No effect on growth in presence of complexes 4, 5b, 5c, 5d, and ligand 3.

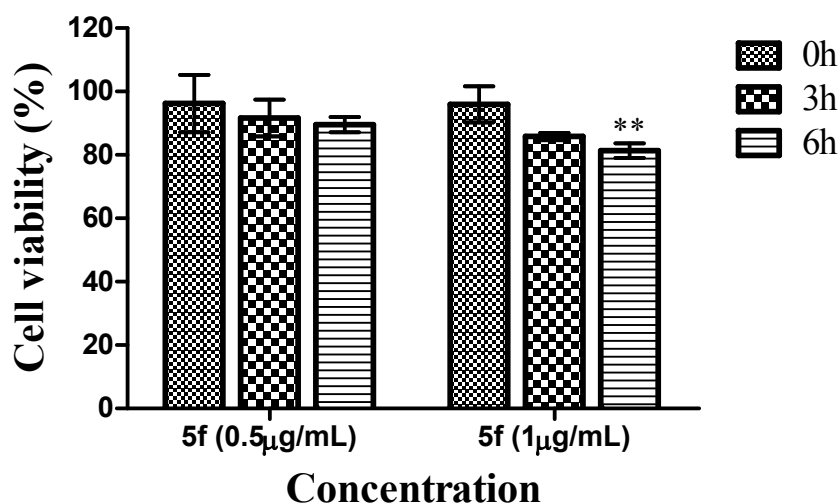

**Figure S23:** MTT assay indicate negligible cell toxicity of the residual compound [CuL(Benzhydrylamine)] 5f. Data indicate percent cell viability of HEK-293 kidney cell line at 3 hours and 6 hours of direct exposure of the residual compound to the cell. Data represent mean  $\pm$  SD (\*\*P<0.01). Each experiment was performed at least twice in triplicate.

C13CPD CDC13 {D:\Spectra} nmr 47

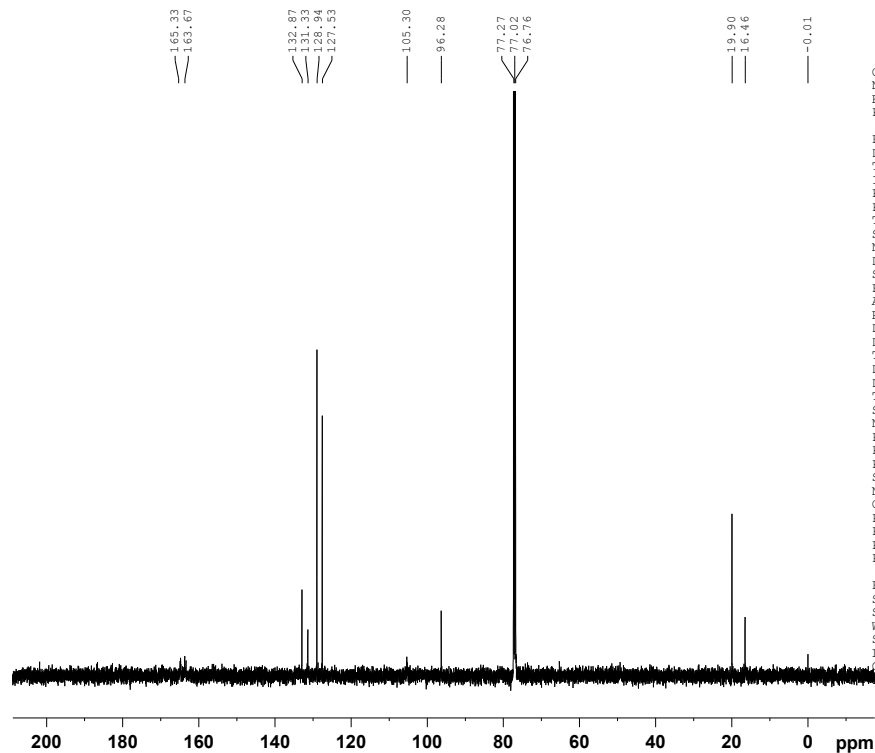

BRUKER  
AVANCE NEO  
500 MHz NMR SPECTROMETER  
SAIF, PANJAB UNIVERSITY,  
CHANDIGARH

Current Data Parameters  
NAME Mar04-2021  
EXPNO 471  
PROCNO 1

F2 - Acquisition Parameters  
Date\_ 20210305  
Time\_ 5.37 h  
INSTRUM Avance Neo 500  
PROBHD Z119470\_0333 (  
PULPROG zgpg30  
TD 65536  
SOLVENT cdcl3  
NS 512  
DS 4  
SWH 37037.035 Hz  
FIDRES 1.130281 Hz  
AQ 0.8847360 sec  
RG 101  
DW 13.500 usec  
DE 6.50 usec  
TE 300.2 K  
D1 2.0000000 sec  
D11 0.0300000 sec  
TD0 1  
SF01 125.7804233 MHz  
NUC1 13C  
PO 3.33 usec  
P1 10.00 usec  
PLW1 83.14099884 W  
SF02 500.1720007 MHz  
NUC2 1H  
CPDPRG2 waltz65  
PCPD2 80.00 usec  
PLW2 20.93000031 W  
PLW12 0.32703000 W  
PLW13 0.16449000 W

F2 - Processing parameters  
SI 32768  
SF 125.7678465 MHz  
WDW EM  
SSB 0  
LB 1.00 Hz  
GB 0  
PC 1.40

Figure S24: <sup>13</sup>C-NMR Spectrum of H<sub>2</sub>L in CDCl<sub>3</sub>.

1H\_8scan CDC13 {D:\Spectra} nmr 46

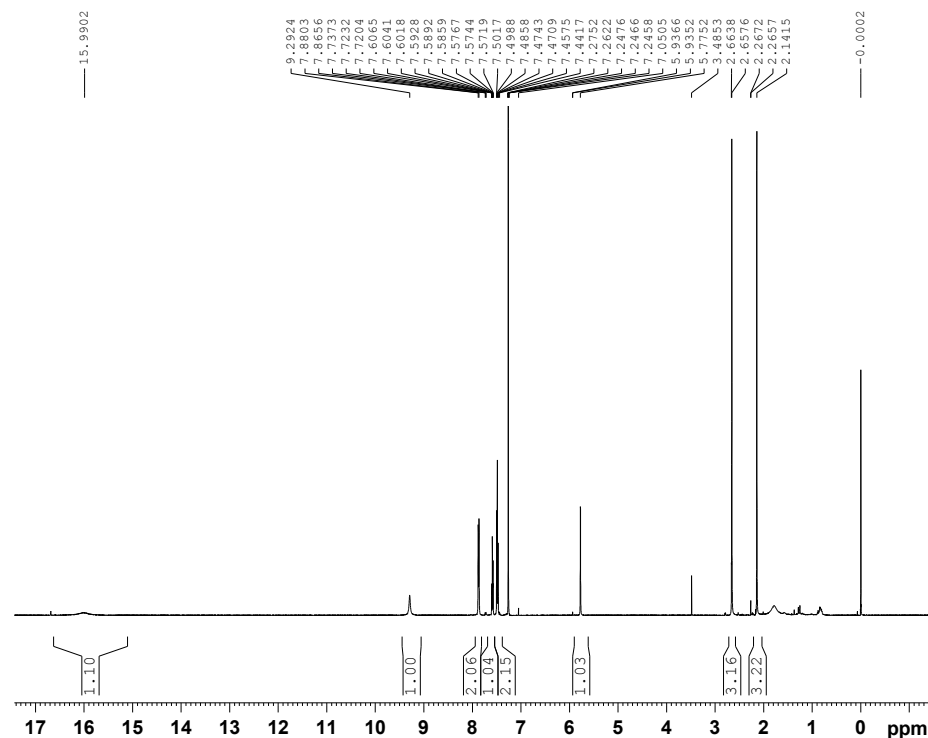

BRUKER  
AVANCE NEO  
500 MHz NMR  
SPECTROMETER  
SAIF, P.U.

Current Data Parameters  
NAME Mar04-2021  
EXPNO 460  
PROCNO 1

F2 - Acquisition Parameters  
Date\_ 20210305  
Time\_ 4.43 h  
INSTRUM Avance Neo 500  
PROBHD Z119470\_0333 (  
PULPROG zg30  
TD 65536  
SOLVENT cdcl3  
NS 8  
DS 0  
SWH 14705.893 Hz  
FIDRES 0.448788 Hz  
AQ 2.2282240 sec  
RG 101  
DW 34.000 usec  
DE 6.79 usec  
TE 300.1 K  
D1 1.0000000 sec  
TD0 1  
SF01 500.1730885 MHz  
NUC1 1H  
PO 3.33 usec  
P1 10.00 usec  
PLW1 20.93000031 W

F2 - Processing parameters  
SI 65536  
SF 500.1700110 MHz  
WDW EM  
SSB 0  
LB 0.30 Hz  
GB 0  
PC 1.00

Figure S25 (a): <sup>1</sup>H-NMR Spectrum of ligand H<sub>2</sub>L in CDCl<sub>3</sub> (Whole Spectrum).



BD  
1H\_8scan CDC13 {D:\Spectra} nmr 46

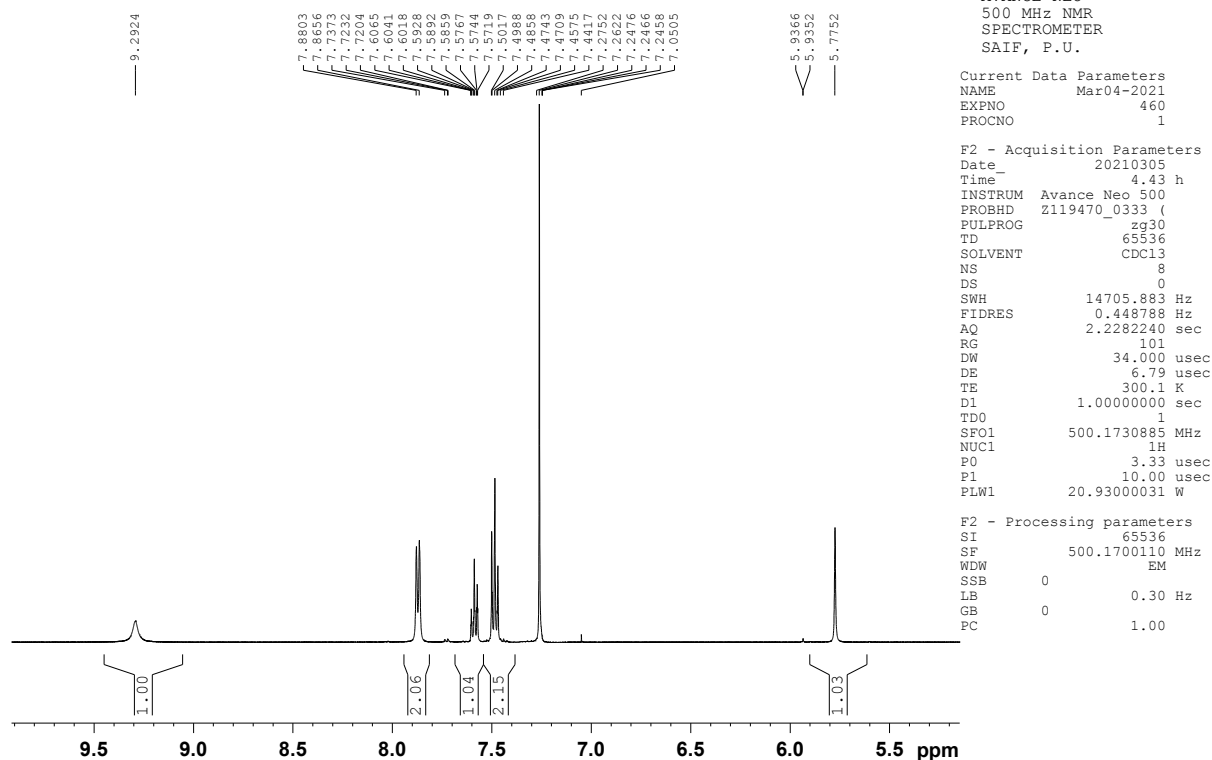

Figure S25 (b):  $^1\text{H}$ -NMR Spectrum of ligand  $\text{H}_2\text{L}$  in  $\text{CDCl}_3$  (Partial Spectrum).

### TGA and DSC analysis of complexes 5a-5f

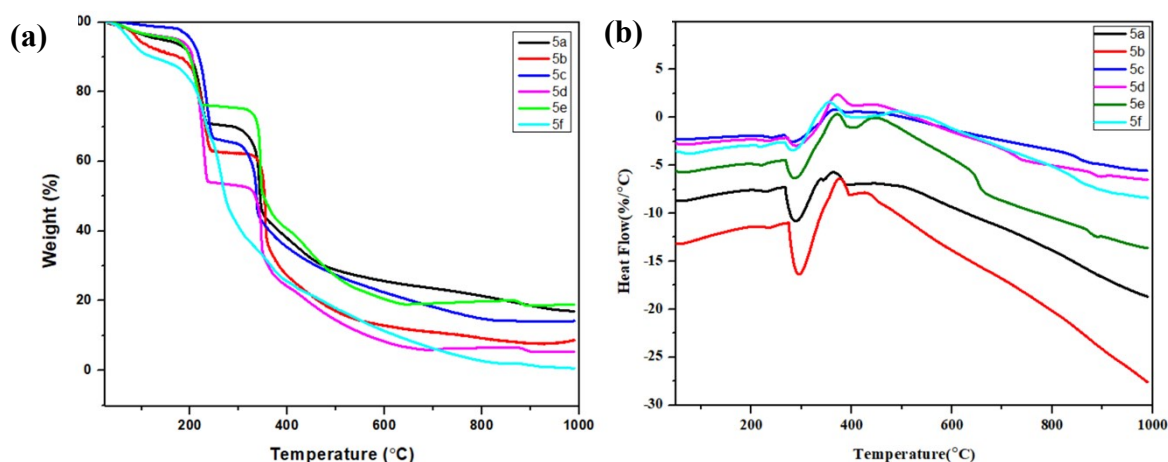

Figure S26: (a) Thermo gravimetric curves of all solvated metal complexes and (b) DSC plot of all solvated metal complexes.

Thermal gravimetric analysis was performed to check the thermal stability of all the synthesized copper complexes over the temperature range 25-1000 °C under nitrogen

atmosphere. The weight loss pattern is explained in **Table-S10**. In all the copper complexes described and evaluated in this manuscript, the residue is CuO. In case of DSC analysis, the sharp endothermic peak in the range of 285-295 °C for complexes 5a-5f was in good agreement with TGA data.

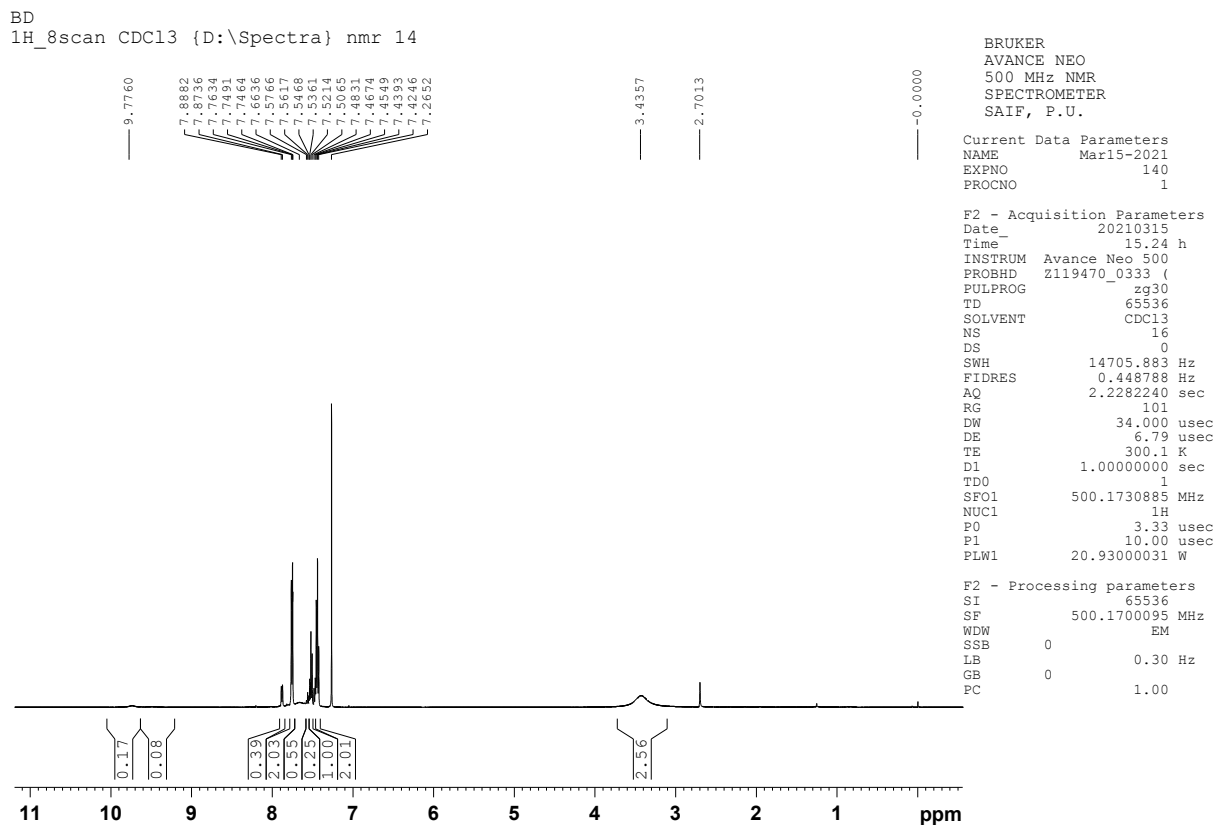

**Figure S27:**  $^1\text{H}$ -NMR Spectra of benzohydrazide in  $\text{CDCl}_3$ .
